# Supplementary material
Source: publisher figshare collection journal article supplement (https://tandf.figshare.com/articles/dataset/_/9909104)

# **Supplemental material to “Chemical weathering in a moraine at the ice sheet margin at Kangerlussuaq, western Greenland”**

**by Auqué, Puigdomenech, Tullborg, Gimeno, Grodzinsky and Hogmalm**

## **Location and sampling date of water and till samples**

The location of the samples taken in the studied moraine is indicated in the map at the right of Figure 1 in the paper. Several sample types (porewater, meltwater ponds, streams and till) were taken from each of the sampling points, denoted with labels 01 to 16, and Table S1 shows their names, their GPS coordinates and sampling date. The locations of the water samples collected outside the studied moraine are shown in the map in the middle of Figure 1 in the paper and their coordinates and sampling dates are listed in Table S2. The name of each sample consists of some letters to indicate the sample type (PW for porewater; MP for meltwater pond; ST for stream, TS for till sample, and L for lake), followed by an indication about the sampling point: either a two digit number (01 to 16) or some letters: D for “delta”, IT for “ice tunnel”, AW for “artesian flow”. For the two lakes sampled in this study the nomenclature used was the same as that within the GAP project (Henkemans et al. 2018). The sampling year is indicated with an appended two-digit number (either 14, 15 or 16).

*Table S1. Coordinates and sampling dates for the waters and till samples from the studied moraine.*

| Sampling point | Water sample | Date       | Coordinates |          | Till sample | Date       | Coordinates |          |
|----------------|--------------|------------|-------------|----------|-------------|------------|-------------|----------|
|                |              | yyyy-mm-dd | Lat.(N)     | Long.(W) |             | yyyy-mm-dd | Lat.(N)     | Long.(W) |
| 1              | PW0114       | 2014-09-01 | 67.1531     | -50.0498 | TS0116      | 2016-08-24 | 67.1531     | -50.0499 |
|                | PW0115       | 2015-09-27 | 67.1530     | -50.0499 |             |            |             |          |
|                | PW0116       | 2016-08-24 | 67.1531     | -50.0499 |             |            |             |          |
|                | ST0114       | 2014-09-01 | 67.1531     | -50.0498 |             |            |             |          |
|                | ST0115       | 2015-09-25 | 67.1528     | -50.0499 |             |            |             |          |
| 2              | PW0214       | 2014-09-01 | 67.1529     | -50.0496 | TS0216      | 2016-08-25 | 67.1529     | -50.0494 |
|                | MP0214       | 2014-09-01 | 67.1529     | -50.0496 |             |            |             |          |
|                | MP0215       | 2015-09-26 | 67.1529     | -50.0495 |             |            |             |          |
|                | MP0216       | 2016-08-29 | 67.1528     | -50.0495 |             |            |             |          |
| 3              | MP0314       | 2014-09-01 | 67.1526     | -50.0495 |             |            |             |          |
|                | MP0315       | 2015-09-26 | 67.1527     | -50.0494 |             |            |             |          |
| 4              | MP0414       | 2014-09-01 | 67.1527     | -50.0486 |             |            |             |          |
| 5              | PW0516       | 2016-08-27 | 67.1515     | -50.0467 | TS0516      | 2016-08-27 | 67.1515     | -50.0467 |
|                | MP0514       | 2014-09-03 | 67.1515     | -50.0468 |             |            |             |          |
|                | MP0516       | 2016-08-29 | 67.1515     | -50.0467 |             |            |             |          |
| 6              | PW0616       | 2016-08-27 | 67.1514     | -50.0463 | TS0616      | 2016-08-27 | 67.1514     | -50.0463 |
| 7              | PW0714       | 2014-09-03 | 67.1514     | -50.0460 |             |            |             |          |
| 8              | MP0814       | 2014-09-03 | 67.1509     | -50.0461 |             |            |             |          |
| 9              | PW0916       | 2016-08-27 | 67.1512     | -50.0453 | TS0916      | 2016-08-27 | 67.1512     | -50.0453 |
|                | MP0916       | 2016-08-27 | 67.1512     | -50.0450 |             |            |             |          |
| 10             | PW1016       | 2016-08-26 | 67.1509     | -50.0449 | TS1016      | 2016-08-25 | 67.1509     | -50.0450 |
|                | MP1016       | 2016-08-25 | 67.1509     | -50.0448 |             |            |             |          |
| 11             | PW1116       | 2016-08-26 | 67.1510     | -50.0430 | TS1116      | 2016-08-25 | 67.1510     | -50.0430 |
|                | MP1116       | 2016-08-29 | 67.1510     | -50.0430 |             |            |             |          |
| 12             | MP1216       | 2016-08-29 | 67.1560     | -50.0497 | TS1216      | 2016-08-29 | 67.1560     | -50.0496 |
| 13             | MP1316       | 2016-08-29 | 67.1470     | -50.0439 | TS1316      | 2016-08-29 | 67.1470     | -50.0438 |
| 15             | MP1516       | 2016-08-29 | 67.1442     | -50.0429 | TS1516      | 2016-08-29 | 67.1442     | -50.0429 |

*Table S2. Coordinates and sampling dates for the waters collected outside the studied moraine.*

| Water sample | Date       | Coordinates |          | Comment                                                                                        |
|--------------|------------|-------------|----------|------------------------------------------------------------------------------------------------|
|              | yyyy-mm-dd | Lat.(N)     | Long.(W) |                                                                                                |
| PWD14        | 2014-09-02 | 67.1557     | -50.0714 | Porewater tube in glacial delta.                                                               |
| STAW16       | 2016-08-24 | 67.1532     | -50.0408 | Artesian flow on the ice sheet near the moraine.                                               |
| STD14        | 2014-09-02 | 67.1563     | -50.0679 | Stream in glacial delta.                                                                       |
| STIT16       | 2016-08-26 | 67.1572     | -50.0655 | Terminus outflow from an ice tunnel.                                                           |
| L2515        | 2015-09-25 | 67.1495     | -50.0797 | Lake from which drilling water was extracted for the deep borehole GAP04 (Harper et al. 2016). |
| L2516        | 2016-08-25 | 67.1495     | -50.0797 | - “ -                                                                                          |
| L3815        | 2015-09-30 | 67.1384     | -50.0673 | Ice dammed lake.                                                                               |

## Till data

The grain size distribution and analytical data for the till samples are provided in Tables S3 and S4. Table S3 lists the experimental data for the main components, and Table S4 contains data for some additional chemical elements and the  $^{87}\text{Sr}/^{86}\text{Sr}$  ratios. The sieved till samples were sent on September 2016 to ALS Scandinavia AB in Luleå, Sweden. The oxide percentages in Table S3 were obtained by ICP-AES, while carbon and sulfur were analysed by a LECO Corp. instrument, and the other elements were analysed after lithium borate fusion followed by ICP-MS. The samples analysed for the strontium isotope ratios ( $^{87}\text{Sr}/^{86}\text{Sr}$ ) were also sent to ALS Scandinavia AB, Luleå, Sweden, on December 2016; the samples were prepared by  $\text{HNO}_3$ +HF digestion followed by ion-exchange separation and MC-ICP-MS analysis.

The compositions of amphiboles and biotites were estimated with an SEM-EDS instrument (Hitachi S3400N equipped with an energy dispersive system) at the Department for Earth Sciences, Gothenburg University, Sweden. Compositions for the amphiboles and biotites are provided in Tables S5 and S6, respectively. A large number of plagioclases were tested for their Ca/Na ratios and all showed Na-dominated composition being in the oligoclase range  $\text{An}_{20}$ - $\text{An}_{30}$ .

Results of the leaching experiments are reported in Table S7. The samples were centrifuged, acidified and analysed using a triple quadrupole ICP-MS instrument at the Department of Earth Sciences, Gothenburg University (Gothenburg, Sweden). Measurement uncertainties were between 7 and 10 %. Leaching batch experiments with a larger volume (1 L), with the same solid/solution ratio, were run for 7 days, and the samples were sent for isotope analysis (managed by the Äspö Hard Rock Laboratory, Oskarshamn, Sweden) to the Environmental Isotope Laboratory (EIL), University of Waterloo (Waterloo, ON, Canada), and the data are reported in Table S8.

Table S3. Analytical results for the till samples collected in this study. “LOI” stands for loss on ignition at 1000 °C. Note that more precise data for Sr and Ba is given in Table S4.

| Sample | Sieve size<br>(mm) | Fraction<br>(%) | SiO <sub>2</sub> | Al <sub>2</sub> O <sub>3</sub> | Fe <sub>2</sub> O <sub>3</sub> | CaO  | MgO  | Na <sub>2</sub> O | K <sub>2</sub> O | Cr <sub>2</sub> O <sub>3</sub> | TiO <sub>2</sub> | MnO  | P <sub>2</sub> O <sub>5</sub> | SrO  | BaO  | LOI   | Tot.  | C    | S    |
|--------|--------------------|-----------------|------------------|--------------------------------|--------------------------------|------|------|-------------------|------------------|--------------------------------|------------------|------|-------------------------------|------|------|-------|-------|------|------|
|        |                    |                 | %                |                                |                                |      |      |                   |                  |                                |                  |      |                               |      |      |       |       |      |      |
| TS0116 | <0.04              | 1.81            | 62.40            | 15.40                          | 7.31                           | 5.62 | 2.83 | 3.80              | 1.48             | 0.02                           | 0.80             | 0.11 | 0.22                          | 0.06 | 0.07 | 1.75  | 101.8 | 0.44 | 0.02 |
|        | 0.04-0.125         | 26.62           | 64.30            | 14.70                          | 7.48                           | 5.36 | 2.58 | 3.94              | 1.40             | 0.01                           | 0.80             | 0.12 | 0.21                          | 0.06 | 0.06 | 0.80  | 101.8 | 0.28 | 0.02 |
|        | 0.125-0.25         | 30.86           | 67.70            | 14.10                          | 5.93                           | 4.51 | 1.99 | 3.68              | 1.21             | 0.01                           | 0.55             | 0.10 | 0.11                          | 0.05 | 0.05 | 0.46  | 100.4 | 0.15 | 0.01 |
|        | 0.25-0.5           | 21.86           | 70.60            | 14.00                          | 4.30                           | 3.89 | 1.46 | 3.86              | 1.13             | 0.01                           | 0.31             | 0.06 | 0.03                          | 0.05 | 0.05 | 0.24  | 99.99 | 0.06 | <0.0 |
|        | >0.5               | 18.85           | 70.90            | 14.55                          | 4.32                           | 3.66 | 1.41 | 4.12              | 1.71             | 0.01                           | 0.28             | 0.06 | 0.06                          | 0.05 | 0.07 | 0.40  | 101.6 | 0.09 | 0.01 |
| TS0516 | <0.04              | 4.55            | 61.60            | 14.30                          | 7.35                           | 5.25 | 2.65 | 3.40              | 1.53             | 0.02                           | 0.81             | 0.12 | 0.18                          | 0.04 | 0.07 | 1.34  | 98.66 | 0.34 | 0.01 |
|        | 0.04-0.125         | 17.44           | 63.70            | 13.60                          | 7.58                           | 4.98 | 2.18 | 3.30              | 1.32             | 0.01                           | 0.91             | 0.13 | 0.16                          | 0.04 | 0.06 | 0.18  | 98.15 | 0.09 | 0.01 |
|        | 0.125-0.25         | 35.31           | 68.90            | 13.05                          | 5.23                           | 4.04 | 1.63 | 3.42              | 1.26             | 0.01                           | 0.47             | 0.09 | 0.06                          | 0.04 | 0.05 | 0.18  | 98.43 | 0.06 | <0.0 |
|        | 0.25-0.5           | 28.05           | 72.80            | 12.75                          | 3.97                           | 3.46 | 1.25 | 3.98              | 1.34             | 0.01                           | 0.26             | 0.06 | 0.03                          | 0.02 | 0.06 | 0.13  | 100.1 | 0.04 | <0.0 |
|        | >0.5               | 14.64           | 71.30            | 13.35                          | 4.91                           | 3.44 | 1.44 | 3.65              | 1.72             | 0.01                           | 0.33             | 0.07 | 0.09                          | 0.03 | 0.06 | 0.32  | 100.7 | 0.06 | 0.01 |
| TS0616 | <0.04              | 1.89            | 63.00            | 14.10                          | 7.11                           | 5.26 | 2.57 | 3.60              | 1.59             | 0.02                           | 0.85             | 0.11 | 0.18                          | 0.05 | 0.07 | 2.00  | 100.5 | 0.47 | 0.01 |
|        | 0.04-0.125         | 19.37           | 63.20            | 13.75                          | 7.18                           | 4.81 | 2.20 | 3.35              | 1.50             | 0.01                           | 0.75             | 0.12 | 0.14                          | 0.04 | 0.06 | 0.93  | 98.04 | 0.31 | 0.01 |
|        | 0.125-0.25         | 23.36           | 68.70            | 13.65                          | 6.76                           | 4.54 | 1.99 | 3.42              | 1.41             | 0.01                           | 0.68             | 0.11 | 0.10                          | 0.04 | 0.06 | 0.44  | 101.9 | 0.18 | 0.01 |
|        | 0.25-0.5           | 16.91           | 70.50            | 13.20                          | 5.01                           | 3.83 | 1.55 | 3.66              | 1.36             | 0.01                           | 0.33             | 0.07 | 0.04                          | 0.04 | 0.06 | 0.36  | 100.0 | 0.08 | <0.0 |
|        | >0.5               | 38.48           | 69.10            | 14.00                          | 5.10                           | 3.69 | 1.47 | 3.96              | 1.97             | 0.01                           | 0.38             | 0.07 | 0.08                          | 0.03 | 0.08 | 0.25  | 100.1 | 0.05 | <0.0 |
| TS0916 | <0.04              | 0.94            | 62.60            | 14.70                          | 7.17                           | 5.43 | 2.65 | 3.78              | 1.65             | 0.02                           | 0.85             | 0.11 | 0.19                          | 0.05 | 0.07 | 1.24  | 100.5 | 0.27 | 0.01 |
|        | 0.04-0.125         | 11.90           | 64.80            | 14.15                          | 7.15                           | 5.08 | 2.31 | 3.45              | 1.41             | 0.01                           | 0.86             | 0.12 | 0.18                          | 0.03 | 0.06 | 0.98  | 100.5 | 0.17 | 0.01 |
|        | 0.125-0.25         | 26.27           | 66.90            | 13.60                          | 6.69                           | 4.53 | 2.01 | 3.38              | 1.39             | 0.01                           | 0.65             | 0.11 | 0.11                          | 0.04 | 0.06 | 0.40  | 99.88 | 0.15 | 0.01 |
|        | 0.25-0.5           | 18.97           | 71.00            | 13.20                          | 5.64                           | 4.02 | 1.73 | 3.91              | 1.39             | 0.01                           | 0.39             | 0.09 | 0.07                          | 0.02 | 0.06 | 0.33  | 101.8 | 0.10 | <0.0 |
|        | >0.5               | 41.92           | 69.50            | 14.30                          | 5.74                           | 3.99 | 1.81 | 3.65              | 1.81             | 0.01                           | 0.44             | 0.08 | 0.07                          | 0.03 | 0.07 | 0.32  | 101.8 | 0.06 | <0.0 |
| TS1016 | <0.04              | 3.62            | 61.40            | 14.20                          | 6.79                           | 5.08 | 2.48 | 3.42              | 1.62             | 0.02                           | 0.75             | 0.11 | 0.16                          | 0.04 | 0.07 | 1.95  | 98.09 | 0.63 | 0.01 |
|        | 0.04-0.125         | 19.33           | 64.60            | 13.85                          | 6.73                           | 4.90 | 2.20 | 3.62              | 1.51             | 0.01                           | 0.77             | 0.11 | 0.16                          | 0.05 | 0.06 | 0.99  | 99.56 | 0.38 | 0.01 |
|        | 0.125-0.25         | 24.77           | 67.20            | 13.35                          | 6.23                           | 4.44 | 1.92 | 3.35              | 1.30             | 0.01                           | 0.69             | 0.10 | 0.10                          | 0.02 | 0.06 | 0.69  | 99.46 | 0.27 | 0.01 |
|        | 0.25-0.5           | 18.01           | 69.70            | 12.50                          | 4.69                           | 3.68 | 1.51 | 3.75              | 1.34             | 0.01                           | 0.35             | 0.08 | 0.06                          | 0.02 | 0.06 | 0.36  | 98.11 | 0.13 | <0.0 |
|        | >0.5               | 34.27           | 69.60            | 13.70                          | 5.07                           | 3.62 | 1.66 | 3.67              | 1.87             | 0.01                           | 0.35             | 0.07 | 0.08                          | 0.04 | 0.08 | 0.40  | 100.2 | 0.06 | <0.0 |
| TS1116 | <0.04              | 2.98            | 62.10            | 14.75                          | 7.54                           | 5.63 | 2.79 | 3.86              | 1.43             | 0.02                           | 0.91             | 0.12 | 0.20                          | 0.05 | 0.06 | 0.63  | 100.0 | 0.14 | 0.01 |
|        | 0.04-0.125         | 11.79           | 65.50            | 14.55                          | 7.75                           | 5.24 | 2.43 | 3.61              | 1.29             | 0.01                           | 0.89             | 0.13 | 0.19                          | 0.05 | 0.06 | 0.16  | 101.8 | 0.07 | 0.02 |
|        | 0.125-0.25         | 13.24           | 67.30            | 13.95                          | 6.83                           | 4.65 | 2.02 | 3.62              | 1.04             | 0.01                           | 0.75             | 0.11 | 0.09                          | 0.04 | 0.05 | 0.06  | 100.5 | 0.05 | 0.02 |
|        | 0.25-0.5           | 13.94           | 70.60            | 13.80                          | 5.23                           | 4.04 | 1.57 | 4.05              | 1.10             | 0.01                           | 0.40             | 0.08 | 0.04                          | 0.06 | 0.05 | -0.01 | 101.0 | 0.03 | <0.0 |
|        | >0.5               | 58.05           | 68.90            | 14.05                          | 5.35                           | 3.91 | 1.82 | 3.83              | 1.67             | 0.01                           | 0.38             | 0.07 | 0.06                          | 0.04 | 0.07 | 0.17  | 100.3 | 0.03 | 0.01 |

(Continued)

Table S3. Continued.

| Sample  | Sieve size<br>(mm) | Fracti<br>on<br>(%) | SiO <sub>2</sub> | Al <sub>2</sub> O <sub>3</sub> | Fe <sub>2</sub> O <sub>3</sub> | CaO  | MgO  | Na <sub>2</sub> O | K <sub>2</sub> O | Cr <sub>2</sub> O <sub>3</sub> | TiO <sub>2</sub> | MnO  | P <sub>2</sub> O <sub>5</sub> | SrO  | BaO  | LOI  | Tot    | C    | S     |
|---------|--------------------|---------------------|------------------|--------------------------------|--------------------------------|------|------|-------------------|------------------|--------------------------------|------------------|------|-------------------------------|------|------|------|--------|------|-------|
|         |                    |                     | %                |                                |                                |      |      |                   |                  |                                |                  |      |                               |      |      |      |        |      |       |
| TS1216  | <0.04              | 0.89                | 63.00            | 15.45                          | 7.14                           | 5.55 | 2.82 | 3.90              | 1.44             | 0.01                           | 0.74             | 0.11 | 0.22                          | 0.05 | 0.07 | 1.15 | 101.65 | 0.28 | <0.01 |
|         | 0.04-0.125         | 9.91                | 64.40            | 14.90                          | 7.27                           | 5.30 | 2.56 | 3.89              | 1.30             | 0.01                           | 0.75             | 0.11 | 0.22                          | 0.06 | 0.06 | 0.53 | 101.36 | 0.20 | 0.02  |
|         | 0.125-0.25         | 30.54               | 65.60            | 14.75                          | 6.79                           | 5.03 | 2.29 | 4.18              | 1.16             | 0.01                           | 0.66             | 0.10 | 0.17                          | 0.07 | 0.05 | 0.45 | 101.31 | 0.16 | 0.01  |
|         | 0.25-0.5           | 19.58               | 70.30            | 14.65                          | 4.93                           | 4.16 | 1.52 | 4.32              | 1.12             | 0.01                           | 0.37             | 0.07 | 0.06                          | 0.06 | 0.05 | 0.26 | 101.88 | 0.07 | <0.01 |
|         | >0.5               | 39.08               | 69.10            | 14.30                          | 4.32                           | 3.57 | 1.47 | 4.16              | 1.68             | 0.01                           | 0.30             | 0.05 | 0.06                          | 0.06 | 0.07 | 0.23 | 99.38  | 0.03 | <0.01 |
| TS1316  | <0.04              | 4.61                | 63.90            | 14.50                          | 6.88                           | 5.20 | 2.50 | 3.51              | 1.58             | 0.01                           | 0.75             | 0.11 | 0.16                          | 0.04 | 0.07 | 1.38 | 100.59 | 0.40 | 0.01  |
|         | 0.04-0.125         | 11.68               | 63.00            | 14.20                          | 7.56                           | 5.18 | 2.26 | 3.54              | 1.43             | 0.01                           | 0.83             | 0.12 | 0.16                          | 0.04 | 0.06 | 0.28 | 98.67  | 0.13 | 0.01  |
|         | 0.125-0.25         | 20.99               | 70.80            | 13.30                          | 5.96                           | 4.17 | 1.71 | 3.40              | 1.31             | 0.01                           | 0.56             | 0.10 | 0.05                          | 0.04 | 0.06 | 0.06 | 101.53 | 0.06 | 0.01  |
|         | 0.25-0.5           | 30.09               | 73.80            | 13.25                          | 4.18                           | 3.62 | 1.32 | 3.64              | 1.29             | 0.01                           | 0.29             | 0.06 | 0.05                          | 0.02 | 0.06 | 0.22 | 101.81 | 0.05 | <0.01 |
|         | >0.5               | 32.63               | 72.10            | 13.25                          | 3.75                           | 2.96 | 1.04 | 3.74              | 1.82             | 0.01                           | 0.22             | 0.05 | 0.05                          | 0.05 | 0.08 | 0.25 | 99.37  | 0.05 | <0.01 |
| TS1516a | <0.04              | 3.00                | 62.50            | 14.50                          | 6.68                           | 5.12 | 2.47 | 3.49              | 1.61             | 0.01                           | 0.73             | 0.11 | 0.15                          | 0.04 | 0.07 | 3.36 | 100.84 | 1.31 | 0.04  |
|         | 0.04-0.125         | 29.86               | 64.40            | 13.90                          | 6.59                           | 4.88 | 2.20 | 3.65              | 1.52             | 0.01                           | 0.71             | 0.11 | 0.16                          | 0.04 | 0.07 | 2.05 | 100.29 | 0.75 | 0.03  |
|         | 0.125-0.25         | 22.69               | 66.60            | 12.90                          | 6.14                           | 4.30 | 1.84 | 3.49              | 1.33             | 0.01                           | 0.60             | 0.10 | 0.09                          | 0.04 | 0.06 | 1.00 | 98.50  | 0.39 | 0.02  |
|         | 0.25-0.5           | 15.62               | 71.90            | 13.25                          | 5.14                           | 3.82 | 1.49 | 3.68              | 1.38             | 0.01                           | 0.34             | 0.07 | 0.05                          | 0.04 | 0.06 | 0.50 | 101.73 | 0.23 | 0.02  |
|         | >0.5               | 28.82               | 70.70            | 13.50                          | 4.42                           | 3.32 | 1.44 | 4.10              | 2.02             | 0.01                           | 0.32             | 0.06 | 0.06                          | 0.02 | 0.08 | 0.50 | 100.55 | 0.15 | 0.01  |
| TS1516b | <0.04              | 4.94                | 62.60            | 14.30                          | 6.96                           | 5.40 | 2.50 | 3.70              | 1.52             | 0.02                           | 0.83             | 0.12 | 0.20                          | 0.04 | 0.07 | 1.36 | 99.62  | 0.39 | 0.02  |
|         | 0.04-0.125         | 26.37               | 65.30            | 13.70                          | 6.24                           | 4.68 | 1.98 | 3.44              | 1.44             | 0.01                           | 0.63             | 0.10 | 0.14                          | 0.04 | 0.06 | 0.58 | 98.34  | 0.23 | 0.01  |
|         | 0.125-0.25         | 22.27               | 70.70            | 13.20                          | 4.98                           | 4.04 | 1.52 | 3.50              | 1.28             | 0.01                           | 0.48             | 0.08 | 0.06                          | 0.03 | 0.06 | 0.33 | 100.27 | 0.10 | 0.01  |
|         | 0.25-0.5           | 18.49               | 72.60            | 12.45                          | 4.19                           | 3.43 | 1.25 | 3.88              | 1.37             | 0.01                           | 0.27             | 0.06 | 0.04                          | 0.02 | 0.06 | 0.12 | 99.75  | 0.06 | <0.01 |
|         | >0.5               | 27.92               | 68.60            | 13.30                          | 4.96                           | 3.43 | 1.43 | 3.67              | 1.86             | 0.01                           | 0.37             | 0.06 | 0.06                          | 0.04 | 0.07 | 0.33 | 98.19  | 0.07 | 0.02  |

Table S4. Additional analytical results for the till samples collected in this study. Note that only a few samples were analysed for strontium isotopes.

| Sample | Sieve size<br>(mm) | Ba  | Ce   | Er   | Eu   | Hf   | Ho   | La   | Lu   | Nd   | Rb   | Sm   | Sr  | Tb   | Th   | U    | V   | Y    | Yb   | Zr  | Co | Cu  | Sc | Zn  | <sup>87</sup> Sr/ <sup>86</sup> Sr |
|--------|--------------------|-----|------|------|------|------|------|------|------|------|------|------|-----|------|------|------|-----|------|------|-----|----|-----|----|-----|------------------------------------|
|        |                    | ppm |      |      |      |      |      |      |      |      |      |      |     |      |      |      |     |      |      |     |    |     |    |     | ‰                                  |
| TS0116 | <0.04              | 582 | 94.9 | 1.94 | 1.52 | 14.7 | 0.68 | 47.7 | 0.26 | 41.7 | 25.7 | 6.43 | 474 | 0.66 | 5.25 | 1.06 | 146 | 20.1 | 2.07 | 625 | 19 | 56  | 17 | 85  |                                    |
|        | 0.04-0.125         | 542 | 75.3 | 1.98 | 1.36 | 10.1 | 0.73 | 36.2 | 0.32 | 32.8 | 24.3 | 5.89 | 477 | 0.65 | 4.76 | 1.10 | 137 | 19.6 | 1.90 | 448 | 18 | 175 | 15 | 147 |                                    |
|        | 0.125-0.25         | 446 | 41.9 | 1.42 | 1.02 | 3.8  | 0.54 | 21.6 | 0.22 | 18.6 | 21.7 | 3.58 | 453 | 0.49 | 2.62 | 0.42 | 103 | 13.7 | 1.34 | 150 | 15 | 73  | 12 | 80  |                                    |
|        | 0.25-0.5           | 410 | 23.6 | 0.94 | 0.71 | 2.3  | 0.31 | 12.3 | 0.12 | 9.9  | 19.8 | 1.92 | 468 | 0.24 | 1.74 | 0.20 | 71  | 7.8  | 0.74 | 85  | 11 | 94  | 8  | 83  |                                    |
|        | >0.5               | 564 | 40.8 | 0.70 | 0.75 | 2.4  | 0.25 | 24.5 | 0.09 | 15.6 | 31.1 | 2.07 | 445 | 0.22 | 3.33 | 0.37 | 63  | 5.8  | 0.63 | 102 | 10 | 57  | 8  | 57  |                                    |
| TS0516 | <0.04              | 559 | 77.6 | 2.40 | 1.51 | 16.0 | 0.79 | 39.5 | 0.34 | 34.0 | 30.5 | 6.06 | 383 | 0.71 | 5.61 | 1.12 | 147 | 22.9 | 2.30 | 685 | 22 | 66  | 17 | 83  | 0.71292                            |
|        | 0.04-0.125         | 486 | 59.3 | 2.53 | 1.49 | 13.2 | 0.89 | 29.4 | 0.39 | 27.4 | 22.7 | 4.96 | 357 | 0.71 | 4.25 | 1.22 | 134 | 23.6 | 2.42 | 541 | 18 | 99  | 16 | 99  |                                    |
|        | 0.125-0.25         | 436 | 32.9 | 1.51 | 0.90 | 2.6  | 0.49 | 16.9 | 0.20 | 14.5 | 20.9 | 2.64 | 357 | 0.44 | 2.57 | 0.35 | 84  | 12.5 | 1.33 | 89  | 12 | 53  | 11 | 62  |                                    |
|        | 0.25-0.5           | 461 | 22.6 | 0.72 | 0.61 | 1.4  | 0.25 | 12.6 | 0.11 | 9.7  | 24.6 | 1.66 | 378 | 0.21 | 1.71 | 0.22 | 63  | 6.1  | 0.61 | 64  | 9  | 67  | 7  | 61  |                                    |
|        | >0.5               | 602 | 40.2 | 0.90 | 0.80 | 3.2  | 0.31 | 23.3 | 0.13 | 15.8 | 49.9 | 2.61 | 389 | 0.29 | 5.41 | 0.42 | 73  | 7.5  | 0.81 | 120 | 12 | 95  | 8  | 81  |                                    |
| TS0616 | <0.04              | 624 | 89.8 | 2.38 | 1.62 | 17.1 | 0.86 | 45.1 | 0.35 | 39.2 | 33.0 | 6.54 | 391 | 0.74 | 6.05 | 1.22 | 154 | 23.1 | 2.30 | 709 | 20 | 53  | 17 | 68  | 0.71369                            |
|        | 0.04-0.125         | 543 | 63.3 | 2.35 | 1.35 | 12.6 | 0.78 | 31.3 | 0.34 | 29.3 | 27.6 | 4.94 | 368 | 0.68 | 4.50 | 1.05 | 126 | 21.4 | 1.91 | 505 | 19 | 91  | 15 | 88  |                                    |
|        | 0.125-0.25         | 481 | 46.2 | 1.75 | 1.09 | 6.2  | 0.66 | 22.9 | 0.26 | 21.0 | 24.5 | 3.80 | 353 | 0.54 | 3.26 | 0.69 | 110 | 17.1 | 1.94 | 240 | 16 | 85  | 13 | 83  |                                    |
|        | 0.25-0.5           | 483 | 29.9 | 1.02 | 0.72 | 1.5  | 0.35 | 17.3 | 0.14 | 12.8 | 26.2 | 2.28 | 399 | 0.27 | 2.15 | 0.25 | 88  | 9.3  | 0.87 | 75  | 11 | 87  | 10 | 77  |                                    |
|        | >0.5               | 635 | 26.1 | 0.78 | 0.69 | 2.0  | 0.30 | 14.4 | 0.10 | 11.9 | 38.7 | 2.24 | 365 | 0.25 | 2.23 | 0.31 | 77  | 7.2  | 0.72 | 91  | 12 | 97  | 9  | 87  |                                    |
| TS0916 | <0.04              | 611 | 82.0 | 2.19 | 1.46 | 16.8 | 0.83 | 40.1 | 0.32 | 37.1 | 33.2 | 5.95 | 389 | 0.77 | 6.01 | 1.27 | 145 | 22.3 | 2.29 | 689 | 20 | 52  | 15 | 72  | 0.71276                            |
|        | 0.04-0.125         | 561 | 61.6 | 2.31 | 1.43 | 12.7 | 0.84 | 29.9 | 0.36 | 27.1 | 29.2 | 5.16 | 392 | 0.78 | 4.53 | 1.03 | 135 | 22.5 | 2.48 | 504 | 18 | 91  | 15 | 91  |                                    |
|        | 0.125-0.25         | 510 | 51.0 | 1.76 | 1.21 | 6.4  | 0.69 | 26.1 | 0.24 | 23.5 | 27.3 | 3.96 | 375 | 0.55 | 3.74 | 0.65 | 114 | 17.4 | 1.77 | 260 | 16 | 82  | 14 | 84  |                                    |
|        | 0.25-0.5           | 502 | 38.7 | 1.12 | 0.90 | 2.3  | 0.38 | 21.4 | 0.16 | 17.1 | 27.3 | 2.84 | 393 | 0.29 | 3.29 | 0.32 | 90  | 10.4 | 1.05 | 96  | 12 | 98  | 9  | 84  |                                    |
|        | >0.5               | 605 | 40.9 | 0.93 | 0.90 | 2.3  | 0.37 | 22.2 | 0.14 | 17.5 | 37.8 | 3.04 | 347 | 0.33 | 4.37 | 0.69 | 88  | 9.5  | 0.85 | 106 | 14 | 108 | 11 | 90  |                                    |
| TS1016 | <0.04              | 574 | 76.5 | 2.11 | 1.41 | 13.6 | 0.81 | 37.3 | 0.32 | 33.3 | 32.6 | 5.55 | 368 | 0.66 | 5.27 | 1.14 | 135 | 20.5 | 2.07 | 563 | 21 | 55  | 16 | 70  | 0.71416                            |
|        | 0.04-0.125         | 556 | 63.4 | 2.39 | 1.44 | 11.3 | 0.78 | 31.8 | 0.35 | 28.8 | 29.0 | 4.82 | 369 | 0.65 | 5.37 | 1.14 | 123 | 20.6 | 2.13 | 452 | 19 | 100 | 15 | 94  | 0.71340                            |
|        | 0.125-0.25         | 533 | 47.6 | 2.01 | 1.07 | 5.2  | 0.71 | 24.0 | 0.28 | 22.2 | 26.7 | 3.98 | 374 | 0.54 | 3.51 | 0.72 | 118 | 17.4 | 1.86 | 215 | 16 | 72  | 13 | 77  | 0.71299                            |
|        | 0.25-0.5           | 450 | 32.8 | 0.95 | 0.75 | 2.3  | 0.33 | 17.8 | 0.13 | 14.8 | 23.7 | 2.29 | 345 | 0.28 | 2.34 | 0.32 | 82  | 8.6  | 0.90 | 99  | 12 | 104 | 9  | 87  | 0.71238                            |
|        | >0.5               | 633 | 48.8 | 0.97 | 0.68 | 2.8  | 0.34 | 27.5 | 0.14 | 19.3 | 36.9 | 2.74 | 392 | 0.33 | 2.97 | 0.36 | 84  | 8.4  | 0.91 | 112 | 11 | 78  | 10 | 75  | 0.71449                            |
| TS1116 | <0.04              | 545 | 87.3 | 2.40 | 1.48 | 17.4 | 0.80 | 42.7 | 0.35 | 37.1 | 25.9 | 6.20 | 435 | 0.65 | 5.17 | 1.07 | 155 | 21.2 | 2.02 | 735 | 22 | 38  | 16 | 72  | 0.71033                            |
|        | 0.04-0.125         | 482 | 68.8 | 2.45 | 1.38 | 13.5 | 0.84 | 34.0 | 0.34 | 31.0 | 21.1 | 5.67 | 426 | 0.69 | 4.83 | 0.96 | 134 | 21.9 | 2.18 | 553 | 18 | 127 | 15 | 118 |                                    |
|        | 0.125-0.25         | 432 | 41.0 | 1.81 | 1.06 | 4.1  | 0.59 | 20.9 | 0.23 | 19.4 | 19.5 | 3.69 | 468 | 0.50 | 2.55 | 0.43 | 123 | 16.3 | 1.59 | 162 | 15 | 71  | 13 | 81  |                                    |
|        | 0.25-0.5           | 408 | 27.8 | 0.98 | 0.68 | 2.4  | 0.35 | 14.9 | 0.14 | 11.7 | 18.8 | 2.07 | 482 | 0.27 | 1.85 | 0.20 | 81  | 9.3  | 0.99 | 104 | 11 | 75  | 9  | 74  |                                    |
|        | >0.5               | 547 | 28.7 | 0.82 | 0.84 | 3.0  | 0.29 | 16.6 | 0.13 | 13.2 | 33.8 | 2.12 | 433 | 0.28 | 2.59 | 0.29 | 86  | 7.8  | 0.67 | 118 | 12 | 86  | 9  | 80  |                                    |

(Continued)

Table S4. Continued.

| Sample  | Sieve size<br>(mm) | Ba  | Ce   | Er   | Eu   | Hf   | Ho   | La   | Lu   | Nd   | Rb   | Sm   | Sr  | Tb   | Th   | U    | V   | Y    | Yb   | Zr  | Co | Cu  | Sc | Zn  | <sup>87</sup> Sr/ <sup>86</sup> Sr |
|---------|--------------------|-----|------|------|------|------|------|------|------|------|------|------|-----|------|------|------|-----|------|------|-----|----|-----|----|-----|------------------------------------|
|         |                    | ppm |      |      |      |      |      |      |      |      |      |      |     |      |      |      |     |      |      |     |    |     |    |     | ‰                                  |
| TS1216  | <0.04              | 577 | 98.4 | 1.98 | 1.52 | 13.3 | 0.70 | 48.8 | 0.30 | 40.6 | 25.2 | 6.33 | 518 | 0.64 | 4.56 | 0.89 | 148 | 18.6 | 1.99 | 550 | 21 | 45  | 16 | 78  | 0.70854                            |
|         | 0.04-0.125         | 502 | 71.2 | 1.69 | 1.46 | 9.5  | 0.67 | 35.4 | 0.27 | 32.6 | 21.1 | 5.34 | 524 | 0.59 | 3.38 | 0.67 | 136 | 17.3 | 1.54 | 410 | 18 | 75  | 15 | 94  | 0.70778                            |
|         | 0.125-0.25         | 444 | 57.9 | 1.49 | 1.16 | 5.8  | 0.55 | 28.6 | 0.21 | 26.4 | 18.2 | 4.41 | 532 | 0.53 | 3.33 | 0.45 | 118 | 14.9 | 1.36 | 231 | 16 | 76  | 12 | 88  | 0.70696                            |
|         | 0.25-0.5           | 415 | 28.8 | 0.81 | 0.83 | 1.6  | 0.30 | 16.3 | 0.13 | 13.5 | 17.6 | 2.16 | 575 | 0.25 | 1.33 | 0.18 | 81  | 7.5  | 0.75 | 74  | 10 | 86  | 8  | 77  | 0.70620                            |
|         | >0.5               | 564 | 40.2 | 0.67 | 0.86 | 1.8  | 0.23 | 22.1 | 0.09 | 17.5 | 29.5 | 2.69 | 516 | 0.27 | 2.80 | 0.21 | 63  | 5.7  | 0.55 | 87  | 10 | 91  | 7  | 81  | 0.70840                            |
| TS1316  | <0.04              | 579 | 72.4 | 2.14 | 1.49 | 11.1 | 0.77 | 36.0 | 0.32 | 31.8 | 30.6 | 5.48 | 384 | 0.61 | 4.35 | 0.88 | 142 | 20.5 | 1.81 | 470 | 20 | 51  | 16 | 69  |                                    |
|         | 0.04-0.125         | 520 | 57.3 | 2.51 | 1.51 | 11.2 | 0.91 | 26.9 | 0.36 | 25.9 | 25.1 | 5.08 | 379 | 0.78 | 3.87 | 0.87 | 128 | 23.5 | 2.45 | 450 | 18 | 68  | 15 | 78  |                                    |
|         | 0.125-0.25         | 469 | 39.2 | 1.67 | 0.95 | 3.5  | 0.60 | 19.8 | 0.26 | 17.2 | 21.0 | 3.06 | 357 | 0.50 | 3.10 | 0.46 | 95  | 16.6 | 1.64 | 120 | 12 | 72  | 12 | 73  |                                    |
|         | 0.25-0.5           | 504 | 26.1 | 0.89 | 0.65 | 1.7  | 0.31 | 14.9 | 0.14 | 11.8 | 26.1 | 1.84 | 388 | 0.24 | 2.00 | 0.21 | 76  | 7.7  | 0.77 | 72  | 8  | 77  | 8  | 67  |                                    |
|         | >0.5               | 640 | 26.3 | 0.69 | 0.63 | 2.0  | 0.25 | 14.3 | 0.07 | 11.1 | 35.4 | 1.66 | 387 | 0.21 | 2.15 | 0.30 | 52  | 5.5  | 0.56 | 80  | 7  | 73  | 6  | 63  | 0.71367                            |
| TS1516a | <0.04              | 587 | 78.2 | 2.11 | 1.38 | 14.2 | 0.77 | 40.6 | 0.33 | 34.9 | 31.7 | 6.02 | 373 | 0.67 | 5.34 | 1.21 | 130 | 20.7 | 2.22 | 569 | 20 | 48  | 16 | 67  | 0.71367                            |
|         | 0.04-0.125         | 588 | 63.1 | 2.16 | 1.34 | 10.4 | 0.70 | 31.0 | 0.32 | 28.9 | 29.6 | 5.15 | 381 | 0.59 | 4.12 | 0.92 | 120 | 19.7 | 1.91 | 450 | 19 | 90  | 14 | 87  | 0.71352                            |
|         | 0.125-0.25         | 487 | 42.0 | 1.73 | 1.03 | 4.5  | 0.61 | 20.9 | 0.25 | 19.0 | 24.9 | 3.41 | 353 | 0.49 | 2.99 | 0.59 | 107 | 16.0 | 1.50 | 188 | 14 | 70  | 12 | 73  | 0.71305                            |
|         | 0.25-0.5           | 468 | 25.9 | 1.03 | 0.71 | 1.7  | 0.33 | 15.2 | 0.12 | 11.4 | 24.8 | 2.09 | 368 | 0.25 | 1.93 | 0.28 | 82  | 8.6  | 0.94 | 80  | 11 | 64  | 9  | 64  | 0.71248                            |
|         | >0.5               | 691 | 27.1 | 0.84 | 0.71 | 2.4  | 0.29 | 15.4 | 0.11 | 12.8 | 43.5 | 2.25 | 389 | 0.22 | 2.27 | 0.36 | 75  | 7.2  | 0.79 | 102 | 9  | 70  | 8  | 63  | 0.71408                            |
| TS1516b | <0.04              | 585 | 79.5 | 2.28 | 1.68 | 16.0 | 0.85 | 40.2 | 0.37 | 36.5 | 28.2 | 6.59 | 389 | 0.75 | 5.03 | 1.27 | 144 | 23.3 | 2.14 | 681 | 20 | 40  | 17 | 68  |                                    |
|         | 0.04-0.125         | 539 | 55.1 | 2.00 | 1.32 | 8.8  | 0.77 | 27.2 | 0.31 | 24.3 | 25.1 | 4.36 | 381 | 0.58 | 3.48 | 0.77 | 113 | 19.4 | 2.10 | 368 | 15 | 82  | 14 | 84  |                                    |
|         | 0.125-0.25         | 520 | 38.5 | 1.33 | 1.02 | 2.8  | 0.52 | 19.9 | 0.22 | 17.3 | 25.8 | 3.42 | 385 | 0.42 | 2.94 | 0.41 | 90  | 13.4 | 1.36 | 102 | 12 | 79  | 10 | 72  |                                    |
|         | 0.25-0.5           | 490 | 28.0 | 0.68 | 0.57 | 1.9  | 0.30 | 15.8 | 0.12 | 12.0 | 25.6 | 2.25 | 379 | 0.24 | 2.27 | 0.25 | 70  | 6.9  | 0.82 | 84  | 10 | 147 | 8  | 110 |                                    |
|         | >0.5               | 624 | 35.9 | 0.94 | 0.76 | 2.6  | 0.30 | 20.0 | 0.11 | 15.2 | 38.7 | 2.54 | 379 | 0.25 | 3.05 | 0.39 | 83  | 8.5  | 0.83 | 109 | 10 | 91  | 8  | 68  |                                    |

*Table S5. Hornblende composition estimated from SEM-EDS analyses of 6 different unaltered grains located in 4 different samples (TS1316, TS1516b, TS1016 and TS0516). One SEM-EDS analysis per grain was performed on a single spot, and the mean, minimum and maximum element compositions (atomic %) values are directly calculated among the grains.*

| Element | Atomic % |       |       |       |       |       | For the 6 grains |      |      |
|---------|----------|-------|-------|-------|-------|-------|------------------|------|------|
|         |          |       |       |       |       |       | Mean             | Min. | Max. |
| O       | 62.46    | 63.26 | 62.48 | 64.61 | 63.22 | 63.2  | 63.2             | 62.5 | 64.6 |
| Mg      | 2.97     | 4.33  | 3.12  | 3.79  | 4.8   | 5.51  | 4.1              | 3.0  | 5.5  |
| Al      | 5.53     | 5.18  | 5.75  | 5.28  | 5.12  | 5.24  | 5.4              | 5.1  | 5.8  |
| Si      | 14.94    | 14.86 | 14.84 | 14.54 | 14.74 | 14.97 | 14.8             | 14.5 | 15.0 |
| K       | 0.9      | 0.87  | 0.91  | 0.35  | 0.66  | 0.7   | 0.7              | 0.4  | 0.9  |
| Ca      | 4.57     | 4.53  | 4.65  | 4.34  | 4.41  | 4.41  | 4.5              | 4.3  | 4.7  |
| Ti      | 0.44     | 0.44  | 0.41  | 0.41  | 0.44  | 0.32  | 0.4              | 0.3  | 0.4  |
| Fe      | 7.8      | 6.29  | 7.7   | 6.36  | 5.67  | 4.89  | 6.5              | 4.9  | 7.8  |
| Mn      | 0.07     | 0.15  | 0.15  | <0.1  | <0.1  | 0.11  | 0.1              | 0.1  | 0.2  |
| Cl      | 0.27     | 0.12  | <0.1  | 0.09  | 0.12  | <0.1  | 0.2              | 0.1  | 0.3  |

*Table S6. Biotite compositions estimated from SEM-EDS analyses of 4 different, unaltered grains in three different samples (TS1316, TS1516b and TS0516). The mean, minimum and maximum element composition (atomic %) in each grain was first generated (based on 1-5 spots on each grain in the SEM). Afterwards these values were used to calculate a mean, minimum and maximum value for the 12 grains.*

| Element | Sample TS1316 |      |      | Sample TS1516b |      |      | Sample TS0516 |      |      | For the 3 samples |      |      |
|---------|---------------|------|------|----------------|------|------|---------------|------|------|-------------------|------|------|
|         | Mean          | Min. | Max. | Mean           | Min. | Max. | Mean          | Min. | Max. | Mean              | Min. | Max. |
| O       | 61.2          | 60.7 | 61.6 | 61.3           | 60.9 | 61.8 | 61.3          | 59.2 | 62.3 | 61.3              | 59.2 | 62.3 |
| Mg      | 4.9           | 4.8  | 5.0  | 4.5            | 4.5  | 4.6  | 6.7           | 6.5  | 6.9  | 5.4               | 4.5  | 6.9  |
| Al      | 7.4           | 7.3  | 7.6  | 7.3            | 7.3  | 7.4  | 8.2           | 8.1  | 8.4  | 7.6               | 7.3  | 8.4  |
| Si      | 13.8          | 13.5 | 14.0 | 13.5           | 13.5 | 13.6 | 13.3          | 13.1 | 13.7 | 13.5              | 13.1 | 14.0 |
| K       | 4.6           | 4.2  | 4.9  | 4.7            | 4.6  | 4.8  | 4.7           | 4.4  | 5.2  | 4.7               | 4.2  | 5.2  |
| Ti      | 1.1           | 1.1  | 1.1  | 1.0            | 0.9  | 1.0  | 0.9           | 0.9  | 1.1  | 1.0               | 0.9  | 1.1  |
| Fe      | 6.9           | 6.7  | 7.1  | 7.5            | 7.3  | 7.7  | 4.9           | 4.3  | 5.9  | 6.4               | 4.3  | 7.7  |
| Mn      | 0.1           | 0.1  | 0.1  | 0.2            | 0.1  | 0.2  | <0.1          | <0.1 | <0.1 | 0.1               | 0.1  | 0.2  |



Table S7. Results of the leaching experiments: concentration of the major cations, iron and sulfate in the leachates of the four samples over time. The measured pH of the air-saturated de-ionized water was 5.5 at the beginning of the leaching experiments.

| Sample  | Leaching<br>time<br>(days) | Na<br>meq/L | Mg<br>meq/L | SO <sub>4</sub><br>meq/L | K<br>meq/L | Ca<br>meq/L | Fe<br>meq/L | Σcations<br>meq/L | pH<br>±0.1 |
|---------|----------------------------|-------------|-------------|--------------------------|------------|-------------|-------------|-------------------|------------|
|         |                            |             |             |                          |            |             |             |                   |            |
| TS0516  | 1                          | 0.013       | 0.016       | 0.069                    | 0.026      | 0.059       | 0.015       | 0.115             | 6.02       |
| TS1016  | 1                          | 0.012       | 0.037       | 0.190                    | 0.038      | 0.146       | 0.020       | 0.233             | 6.33       |
| TS1316  | 1                          | 0.005       | 0.015       | 0.028                    | 0.028      | 0.067       | 0.008       | 0.115             | 6.64       |
| TS1516b | 1                          | 0.005       | 0.015       | 0.052                    | 0.028      | 0.059       | 0.020       | 0.107             | 6.51       |
| TS0516  | 7                          | 0.068       | 0.065       | 0.429                    | 0.065      | 0.068       | 0.035       | 0.266             | 6.12       |
| TS1016  | 7                          | 0.070       | 0.229       | 1.432                    | 0.135      | 0.780       | 0.035       | 1.214             | 6.40       |
| TS1316  | 7                          | 0.030       | 0.064       | 0.136                    | 0.063      | 0.093       | 0.046       | 0.249             | 6.79       |
| TS1516b | 7                          | 0.031       | 0.084       | 0.431                    | 0.092      | 0.175       | 0.067       | 0.382             | 6.68       |
| TS0516  | 305                        | 0.073       | 0.135       | 0.673                    | 0.078      | 0.503       | 0.030       | 0.789             | 5.73       |
| TS1016  | 305                        | 0.087       | 0.321       | 1.414                    | 0.176      | 1.339       | 0.044       | 1.924             | 6.51       |
| TS1316  | 305                        | 0.044       | 0.215       | 0.389                    | 0.119      | 0.970       | 0.051       | 1.349             | 6.71       |
| TS1516b | 305                        | 0.040       | 0.163       | 0.958                    | 0.128      | 0.765       | 0.051       | 1.096             | 6.59       |

Table S8. Isotopic results for the leaching experiments. Results for  $\delta^2\text{H}$  and  $\delta^{18}\text{O}$  are reported based on standard corrections to VSMOW (Vienna Standard Mean Ocean Water) and the results for  $\delta^{34}\text{S}_{\text{SO}_4}$  are reported against the Vienna-Canyon Diablo Troilite (VCDT).

| Sample            | Leaching<br>time<br>(days) | $\delta^{18}\text{O}_{\text{SO}_4}$<br>VSMOW ± 0.5‰ | Repeat | $\delta^{34}\text{S}_{\text{SO}_4}$<br>VCDT ± 0.3‰ | Repeat | EC<br>mS/cm | SO <sub>4</sub><br>meq/L | Cl<br>mmol/L | $\delta^2\text{H}$<br>‰ VSMOW | $\delta^{18}\text{O}$ |
|-------------------|----------------------------|-----------------------------------------------------|--------|----------------------------------------------------|--------|-------------|--------------------------|--------------|-------------------------------|-----------------------|
|                   |                            |                                                     |        |                                                    |        |             |                          |              |                               |                       |
| TS0516            | 7                          | -17.25                                              | -16.90 | 2.05                                               | 2.61   | 4.545       | 0.246                    | 0.047        |                               |                       |
| TS1016            | 7                          | -24.60                                              |        | 2.01                                               |        | 12.92       | 0.989                    | 0.038        |                               |                       |
| TS1316            | 7                          | -16.40                                              |        | 2.16                                               |        | 4.89        | 0.105                    | 0.008        |                               |                       |
| TS1516b           | 7                          | -27.00                                              | -27.32 | 0.83                                               | 0.92   | 4.801       | 0.246                    | 0.064        |                               |                       |
| Leaching<br>water | -                          | -                                                   | -      | -                                                  | -      | -           | <0.004                   | <0.006       | -53.8                         | -7.19                 |

## Water data

Analytical data for the waters sampled in this study are provided in Tables S9 and S10. Sample locations and sampling dates are also described in Tables S1 and S2.

The analysis of the moraine water samples was managed by the accredited Äspö Hard Rock Laboratory (Äspö HRL, located in Oskarshamn, Sweden) belonging to the Swedish Nuclear Fuel and Waste Management Company (SKB, with head office in Solna, Sweden).

Analysis of alkalinity (titration, measurement uncertainty 4 %) and major anions (ion chromatography,  $\pm 8$  % for chloride and  $\pm 12$  % for sulfate) were performed at the Äspö HRL. Cation multi-element analyses were performed at ALS Scandinavia AB (Luleå, Sweden) by a combination of Inductively Coupled Plasma Sector Field Mass Spectrometry (ICP-SFMS) and Inductively Coupled Plasma Atomic Emission Spectroscopy (ICP-AES), with uncertainties around 7 % for the main components (Na, K, Ca, Mg, Si, Fe, Mn),  $\pm 10$  % for Sr, and around  $\pm 20$  % for the remaining chemical elements. Most samples collected in 2016 were also sent to DEEP for dissolved inorganic carbon (DIC), dissolved organic carbon (DOC) and total organic carbon (TOC) with an Analytikjena multi N/C 3100 instrument. For the DIC analysis the sample is acidified with phosphoric acid and the amount of released carbon dioxide is determined by a non-dispersive infrared sensor. The analysis of non-purgeable organic carbon (DOC and TOC) is performed according to the Swedish standard SS-EN-1484: after acidification with hydrochloric acid and purging, the sample is oxidised at 800°C and the CO<sub>2</sub> thus formed is determined by a non-dispersive infrared sensor. The Analytikjena instrument analyses non-purgeable organic carbon with an uncertainty of 0.25 mg/L.

Deuterium and <sup>18</sup>O were determined using mass spectrometry at the Institute for Energy Technology (Kjeller, Norway) and the results for  $\delta^{18}\text{O}$  and  $\delta^2\text{H}$  are based on VSMOW (Vienna Standard Mean Ocean Water) with uncertainties of  $\pm 0.2$  ‰ and  $\pm 0.8$  ‰, respectively. Tritium was analysed by liquid scintillation counting at the Environmental Isotope Laboratory, University of Waterloo (Waterloo, ON, Canada) with a detection limit of 0.8 tritium units (TU) and an uncertainty of  $\pm 0.8$  TU. Carbon-13 and Carbon-14 were analysed at the Tandem laboratory, Ångström laboratory, Uppsala University (Uppsala, Sweden) using Accelerator Mass Spectrometry (AMS) instruments.  $\delta^{13}\text{C}$  is reported against the Pee Dee Belemnite (PDB) standard, and the uncertainties are  $\pm 0.1$  ‰. The uncertainties in pMC (percent modern carbon) are given in the data tables. Sulfate isotopes ( $\delta^{34}\text{S}_{\text{SO}_4}$  and  $\delta^{18}\text{O}_{\text{SO}_4}$ ) were determined at the Environmental Isotope Laboratory (EIL), University of Waterloo (Waterloo, ON, Canada) using isotope ratio mass spectrometers (IRMS) after BaCl<sub>2</sub> precipitation, as described by Henkemans et al. (2018). Results for  $\delta^{18}\text{O}_{\text{SO}_4}$  are reported based on standard corrections to VSMOW (Vienna Standard Mean Ocean Water) and the results for  $\delta^{34}\text{S}_{\text{SO}_4}$  are reported against

the Vienna-Canyon Diablo Troilite (VCDT). The uncertainties for  $\delta^{34}\text{S}_{\text{SO}_4}$  and  $\delta^{18}\text{O}_{\text{SO}_4}$  are  $\pm 0.3\text{‰}$  and  $\pm 0.4\text{‰}$ , respectively.  $^{87}\text{Sr}/^{86}\text{Sr}$  isotopic ratios were also determined at EIL using thermal ionization mass spectrometry (TIMS), and the reported uncertainty is less than  $\pm 0.00002$ .

Table S9. Geochemical and isotopic composition of the water samples including the moraine porewaters and ponds (PW and MP samples), the streams (ST) and lakes (LA). Charge balance, equilibrium partial pressure of CO<sub>2</sub> and saturation indices of calcite and gypsum have been calculated using PHREEQC (Parkhurst and Appelo 2013), taking into account the DIC values when available.

| Sample | T    | pH   | Conduct. | Alk   | Na     | K    | Mg   | Ca   | Sr   | Fe    | Al   | Si   | Cl   | SO <sub>4</sub> | δ <sup>2</sup> H <sub>VSMOW</sub> | δ <sup>18</sup> O <sub>VSMOW</sub> | PHREEQC results |                      |                            |                           |
|--------|------|------|----------|-------|--------|------|------|------|------|-------|------|------|------|-----------------|-----------------------------------|------------------------------------|-----------------|----------------------|----------------------------|---------------------------|
|        | (°C) |      | (μS/cm)  | μeq/L | μmol/L |      |      |      |      |       |      |      |      |                 | ‰                                 | ‰                                  | Charge balance  | log P <sub>CO2</sub> | Saturation indices calcite | Saturation indices gypsum |
| PW0114 | 6.5  | 6.44 | 265.0    | 241   | 251    | 143  | 309  | 831  | 1.69 | 0.57  |      | 313  | 93.9 | 888             | -176.03                           | -23.10                             | 13              | -2.37                | -2.57                      | -1.84                     |
| PW0115 | 1.0  | 6.34 | 119.3    | 733   | 121    | 103  | 179  | 459  | 1.16 | 4.83  | 13   | 263  | 69.7 | 316             | -200.47                           | -25.64                             | 6               | -1.82                | -2.50                      | -2.44                     |
| PW0116 | 7.6  | 6.81 | 338.1    | 2806  | 544    | 251  | 576  | 1380 | 2.49 | 38.50 | 20   | 363  | 281  | 770             | -208.93                           | -27.58                             | 4               | -2.09                | -0.57                      | -1.76                     |
| PW0214 | 4.6  | 6.03 | 103.7    | 390   | 87.0   | 83   | 109  | 327  | 0.76 | 2.13  |      | 256  | 61.5 | 262             | -216.97                           | -28.79                             | 4               | -1.75                | -3.14                      | -2.65                     |
| PW0516 | 7.3  | 6.69 | 286.2    | 490   | 154    | 153  | 213  | 1093 | 1.05 | 0.50  | 1.5  | 192  | 40.9 | 1158            | -194.03                           | -24.65                             | 2               | -2.32                | -1.91                      | -1.64                     |
| PW0616 | 6.9  | 7.09 | 165.3    | 1155  | 264    | 112  | 141  | 609  | 0.76 | 23.82 | 41   | 279  | 53.9 | 302             | -207.90                           | -24.91                             | 7               | -2.28                | -1.51                      | -2.38                     |
| PW0714 | 9.9  | 6.89 | 333.0    | 564   | 154    | 167  | 140  | 651  | 0.81 | 3.19  |      | 203  | 101  | 548             | -192.05                           | -24.52                             | 5               | -2.43                | -1.78                      | -2.12                     |
| PW0916 | 3.9  | 7.18 | 199.5    | 895   | 409    | 96   | 165  | 736  | 0.93 | 35.28 | 74   | 329  | 60.6 | 612             | -230.72                           | -29.22                             | 10              | -2.72                | -1.50                      | -2.02                     |
| PW1016 | 6.3  | 6.75 | 87.8     | 511   | 258    | 109  | 70.8 | 247  | 0.40 | 22.20 | 51   | 265  | 90.8 | 212             | -251.57                           | -32.14                             | 9               | -2.51                | -2.55                      | -2.85                     |
| PW1116 | 7.2  | 6.61 | 56.1     | 318   | 121    | 87   | 30.6 | 130  | 0.24 | 5.34  | 11   | 58.7 | 90.8 | 106             | -251.92                           | -32.90                             | -4              | -2.45                | -3.02                      | -3.39                     |
| PWD14  | 6.7  | 7.47 | 29.3     | 179   | 29.7   | 26.6 | 21.3 | 85.3 | 0.19 | 3.08  |      | 44.9 | 51.3 | 41.3            | -219.34                           | -29.45                             | -6              | -3.51                | -2.53                      | -3.94                     |
| MP0214 | 8.1  | 7.20 | 132.4    | 229   | 63.5   | 66   | 143  | 404  | 0.86 | 3.38  |      | 208  | 13.3 | 446             | -190.78                           | -23.28                             | 4               | -3.14                | -2.07                      | -2.36                     |
| MP0215 | 2.2  | 6.91 | 152.2    | 431   | 73.1   | 81   | 182  | 482  | 1.08 | 1.69  | 2.2  | 237  | 13.8 | 423             | -209.85                           | -26.59                             | 3               | -2.61                | -2.12                      | -2.31                     |
| MP0216 | 8.8  | 6.96 | 130.9    | 449   | 100    | 69   | 146  | 434  | 0.83 | 2.49  | 5.9  | 237  | 10.2 | 365             | -214.96                           | -26.37                             | 7               | -3.05                | -1.58                      | -2.42                     |
| MP0314 | 8.3  | 7.35 | 194.5    | 249   | 66.1   | 81   | 189  | 644  | 1.02 | 2.02  |      | 184  | 18.9 | 692             | -188.47                           | -24.22                             | 5               | -3.26                | -1.71                      | -2.02                     |
| MP0315 | 2.2  | 6.85 | 218.0    | 454   | 85.3   | 104  | 239  | 771  | 1.29 | 2.04  | 0.3  | 202  | 23.1 | 793             | -192.33                           | -24.51                             | 2               | -2.53                | -1.98                      | -1.89                     |
| MP0414 | 5.0  | 7.17 | 37.9     | 105   | 24.3   | 31.7 | 32.0 | 123  | 0.19 | 2.99  |      | 61.2 | 9.3  | 109             | -216.94                           | -28.37                             | 6               | -3.45                | -2.95                      | -3.38                     |
| MP0514 | 8.0  | 7.14 | 132.1    | 469   | 43.2   | 94   | 107  | 482  | 0.56 | 17.91 |      | 170  | 15.2 | 430             | -205.50                           | -26.35                             | 0               | -2.77                | -1.75                      | -2.31                     |
| MP0516 | 9.9  | 7.41 | 125.0    | 682   | 43.9   | 91   | 95   | 472  | 0.50 | 3.19  | 3.6  | 153  | 9.0  | 280             | -216.45                           | -26.24                             | 1               | -3.27                | -0.91                      | -2.50                     |
| MP0814 | 9.4  | 7.02 | 200.2    | 323   | 50.5   | 100  | 157  | 736  | 0.69 | 0.54  |      | 144  | 24.5 | 743             | -223.21                           | -29.54                             | 3               | -2.81                | -1.86                      | -1.95                     |
| MP0916 | 7.0  | 7.55 | 138.4    | 729   | 124    | 86   | 118  | 541  | 0.62 | 15.11 | 42   | 220  | 13.8 | 324             | -209.86                           | -24.91                             | 11              | -2.60                | -1.72                      | -2.38                     |
| MP1016 | 9.0  | 7.33 | 134.9    | 683   | 94.4   | 79   | 104  | 494  | 0.55 | 12.71 | 30   | 271  | <6   | 303             | -234.43                           | -29.08                             | 8               | -2.71                | -1.60                      | -2.45                     |
| MP1116 | 6.4  | 6.38 | 10.5     | 45.9  | 52.6   | <10  | 10.2 | 40.4 | 0.10 | 2.02  | 3.7  | 25.9 | <6   | 36.4            | -240.92                           | -30.68                             | 19              | -6.53                | -1.96                      | -4.30                     |
| MP1216 | 6.4  | 7.28 | 88.7     | 398   | 103    | 68   | 73.6 | 329  | 0.71 | 8.99  | 26   | 236  | 9.3  | 223             | -205.76                           | -24.94                             | 13              | -2.78                | -2.27                      | -2.71                     |
| MP1316 | 8.6  | 6.96 | 64.4     | 357   | 24.6   | 58   | 54.7 | 225  | 0.28 | 3.90  | 8.9  | 129  | 7.1  | 126             | -233.73                           | -29.58                             | 5               | -2.92                | -2.19                      | -3.10                     |
| MP1516 | 8.2  | 7.09 | 111.9    | 115   | 51.8   | 45   | 104  | 422  | 0.57 | 3.83  | 7.8  | 108  | 7.62 | 426             | -229.93                           | -29.26                             | 11              | -3.41                | -2.63                      | -2.36                     |
| ST0114 | 8.7  | 7.24 | 66.5     | 295   | 31.6   | 51   | 69.1 | 219  | 0.29 | 10.06 |      | 81.5 | 16.6 | 159             | -205.38                           | -26.76                             | 4               | -3.06                | -2.14                      | -3.01                     |
| ST0115 | 0.9  | 7.06 | 66.9     | 302   | 30.7   | 52   | 66.7 | 228  | 0.29 | 2.08  | 1.5  | 66.2 | 15.8 | 147             | -200.25                           | -25.41                             | 5               | -2.91                | -2.43                      | -3.01                     |
| STD14  | 0.9  | 6.17 | 11.5     | 78.7  | 23.7   | 21   | 38.8 | 57.4 | 0.19 | 34.56 |      | 90.1 | <6   | 14.4            | -220.22                           | -29.58                             | 48              | -2.59                | -4.45                      | -4.55                     |
| STIT16 | 0.4  | 6.13 | 4.9      | 34.4  | 43.5   | <10  | 9.8  | 20.3 | 0.07 | 7.88  | 16.1 | 36.0 | <6   | 5.00            | -213.47                           | -28.04                             | 76              | -3.69                | -5.66                      | -5.43                     |
| STAW16 | 1.4  | 5.49 | 3.2      | <33   | 18.9   | <10  | <4   | 2.69 | 0.02 | 0.07  | 0.25 | <1   | 5.92 | 2.39            | -237.22                           | -30.89                             | 46              |                      |                            | -6.60                     |
| L2515  | 2.3  | 8.17 | 182.4    | 1500  | 334    | 156  | 448  | 382  | 0.55 | 2.67  | 0.88 | 15.0 | 262  | 58.1            | -119.21                           | -12.60                             | 7               | -4.31                | 0.46                       | -3.29                     |
| L2516  | 10.2 | 9.09 | 176.4    | 1475  | 342    | 136  | 406  | 362  | 0.47 | 1.79  | 0.15 | 20.3 | 281  | 46.6            | -116.85                           | -11.42                             | 4               | -4.88                | 0.90                       | -3.46                     |
| L3815  | 1.3  | 7.11 | 11.2     | 68.8  | 10.7   | 11.6 | 15.1 | 34.4 | 0.08 | 2.45  | 3.9  | 23.6 | 5.9  | 15.3            | -217.92 <sup>‡</sup>              | -28.67 <sup>‡</sup>                | 13              | -3.44                | -4.08                      | -4.72                     |

(Continued)

Table S9. Continued.

| Sample | TOC  | DOC  | DIC    | PO4_P <sup>†</sup> | P <sup>†</sup> | NH <sub>4</sub> | NO <sub>2</sub> | NO <sub>3</sub> +NO <sub>2</sub> | $\delta^{18}\text{O}_{\text{SO}_4}$ | $\delta^{34}\text{S}_{\text{SO}_4}$ | <sup>87</sup> Sr/ <sup>86</sup> Sr | $\delta^{13}\text{C}_{\text{VPDB}}$<br>inorg. | $\delta^{13}\text{C}_{\text{VPDB}}$<br>org. | <sup>14</sup> C inorg. | <sup>14</sup> C org. | <sup>3</sup> H |
|--------|------|------|--------|--------------------|----------------|-----------------|-----------------|----------------------------------|-------------------------------------|-------------------------------------|------------------------------------|-----------------------------------------------|---------------------------------------------|------------------------|----------------------|----------------|
|        |      |      | μmol/L |                    |                |                 | mg/L            |                                  | ‰                                   |                                     |                                    | ‰                                             |                                             | PMC %                  |                      | T.U.           |
| PW0114 |      |      |        |                    |                |                 |                 |                                  |                                     |                                     |                                    |                                               |                                             |                        |                      |                |
| PW0115 |      |      |        | 0.0452             | 0.302          | 0.570           | 0.0022          | 0.1550                           |                                     |                                     |                                    |                                               |                                             |                        |                      |                |
| PW0116 | 2023 | 866  | 3197   |                    | 23.4           |                 |                 |                                  | -11.92                              | 10.67                               | 0.72900                            |                                               |                                             |                        |                      | 3.2            |
| PW0214 |      |      |        |                    |                |                 |                 |                                  |                                     |                                     |                                    |                                               |                                             |                        |                      |                |
| PW0516 |      |      |        |                    | 0.315          |                 |                 |                                  |                                     |                                     | 0.74662                            |                                               |                                             |                        |                      |                |
| PW0616 |      | 241  | 1324   |                    | 1.49           |                 |                 |                                  |                                     |                                     | 0.74550                            |                                               |                                             |                        |                      |                |
| PW0714 |      |      |        |                    |                |                 |                 |                                  |                                     |                                     |                                    |                                               |                                             |                        |                      |                |
| PW0916 |      |      |        |                    | 1.80           |                 |                 |                                  |                                     |                                     | 0.74376                            |                                               |                                             |                        |                      |                |
| PW1016 |      |      |        |                    | 1.51           |                 |                 |                                  |                                     |                                     |                                    |                                               |                                             |                        |                      |                |
| PW1116 |      |      |        |                    | 9.59           |                 |                 |                                  |                                     |                                     | 0.74435                            |                                               |                                             |                        |                      |                |
| PWD14  |      |      |        |                    |                |                 |                 |                                  |                                     |                                     |                                    |                                               |                                             |                        |                      |                |
| MP0214 |      |      |        |                    |                |                 |                 |                                  |                                     |                                     |                                    |                                               |                                             |                        |                      |                |
| MP0215 |      |      |        | <0.016             | 0.225          | 0.0389          | 0.0050          | 1.8600                           | -21.70                              | 0.92                                |                                    |                                               |                                             |                        |                      | 2.0            |
| MP0216 | 450  | 316  | 475    |                    | 0.378          |                 |                 |                                  | -16.06                              | 0.75                                | 0.72894                            |                                               |                                             |                        |                      | <0.8           |
| MP0314 |      |      |        |                    |                |                 |                 |                                  |                                     |                                     |                                    |                                               |                                             |                        |                      |                |
| MP0315 |      |      |        | <0.016             | 0.161          | 0.0543          | 0.0049          | 0.8450                           | -17.64                              | 1.53                                |                                    |                                               |                                             |                        |                      | 3.2            |
| MP0414 |      |      |        |                    |                |                 |                 |                                  |                                     |                                     |                                    |                                               |                                             |                        |                      |                |
| MP0514 |      |      |        |                    |                |                 |                 |                                  |                                     |                                     |                                    |                                               |                                             |                        |                      |                |
| MP0516 | 208  | 167  | 691    |                    | 0.142          |                 |                 |                                  | -15.54                              | 1.97                                | 0.74627                            |                                               |                                             |                        |                      | 2.0            |
| MP0814 |      |      |        |                    |                |                 |                 |                                  |                                     |                                     |                                    |                                               |                                             |                        |                      |                |
| MP0916 | 200  | 150  | 724    |                    | 0.623          |                 |                 |                                  | -20.37                              | 1.56                                | 0.74487                            | -5.2                                          | -25.8                                       | 89.4 ± 0.4             | 82.4 ± 0.4           | 1.9            |
| MP1016 | 191  | 117  | 674    |                    | 0.423          |                 |                 |                                  | -23.82                              | 1.96                                | 0.74396                            |                                               |                                             |                        |                      | <0.8           |
| MP1116 | 58.3 | 16.7 | 16.7   |                    | 0.352          |                 |                 |                                  |                                     |                                     | 0.74163                            |                                               |                                             |                        |                      | 0.9            |
| MP1216 | 300  | 208  | 408    |                    | 0.520          |                 |                 |                                  | -22.53                              | 1.05                                | 0.72781                            |                                               |                                             |                        |                      | 2.6            |
| MP1316 | 150  | 125  | 391    |                    | 0.182          |                 |                 |                                  | -23.64                              | 1.43                                | 0.74905                            |                                               |                                             |                        |                      | 1.2            |
| MP1516 | 408  | 316  | 108    |                    | 0.339          |                 |                 |                                  | -24.75                              | -0.30                               | 0.74384                            | -14.0                                         | -23.2                                       | 83.0 ± 0.3             | 78.3 ± 0.4           | 1.4            |
| ST0114 |      |      |        |                    |                |                 |                 |                                  |                                     |                                     |                                    |                                               |                                             |                        |                      |                |
| ST0115 |      |      |        | <0.016             | 0.149          | 0.0142          | 0.0005          | 0.1090                           |                                     |                                     |                                    |                                               |                                             |                        |                      |                |
| STD14  |      |      |        |                    |                |                 |                 |                                  |                                     |                                     |                                    |                                               |                                             |                        |                      |                |
| STIT16 | 175  | 16.7 | 25.0   |                    | 0.391          |                 |                 |                                  |                                     |                                     | 0.72420                            |                                               | -28.0                                       | 91.2 ± 0.4             | 70.5 ± 0.4           | <0.8           |
| STAW16 |      |      |        |                    | 0.077          |                 |                 |                                  |                                     |                                     |                                    |                                               |                                             |                        |                      | <0.8           |
| L2515  |      |      |        | 0.0226             | 0.277          | 0.0160          | <0.0002         | 0.0016                           |                                     |                                     | 0.74373                            | -3.7                                          | -25.4                                       | 154.0 ± 0.5            | 123.1 ± 0.4          | 6.7            |
| L2516  | 1407 | 1374 | 1232   |                    | 0.121          |                 |                 |                                  | 1.42                                | 12.36                               | 0.74480                            | -5.2                                          | -26.1                                       | 148.9 ± 0.3            | 123.7 ± 0.4          | 8.6            |
| L3815  |      |      |        | <0.016             | 0.163          | 0.0007          | 0.0012          | 0.0458                           |                                     |                                     | 0.72978                            | -10.7                                         | -27.8                                       | 93.7 ± 0.8             | 70.3 ± 0.3           | <0.8           |

†: Analyses of phosphate-phosphorus were performed spectrophotometrically; analyses of total elemental phosphorus were performed with ICP-SFMS.

‡:  $\delta^2\text{H}_{\text{VSMOW}}$  and  $\delta^{18}\text{O}_{\text{VSMOW}}$  for sample L3215 were determined at the Environmental Isotope Laboratory, University of Waterloo (Waterloo, ON, Canada).

Table S10. Additional analytical results for the water samples collected in this study.

| Sample | Ba   | Cd     | Co    | Cr    | Cu   | Li   | Mn   | Mo    | Ni    | Pb    | Rb    | Sc    | Sr   | V    | Y      | Zn    | Zr    | U     | Th    |
|--------|------|--------|-------|-------|------|------|------|-------|-------|-------|-------|-------|------|------|--------|-------|-------|-------|-------|
|        | µg/L |        |       |       |      |      |      |       |       |       |       |       |      |      |        |       |       |       |       |
| PW0114 |      |        |       |       |      |      | <3   |       |       |       |       |       | 148  |      |        |       |       |       |       |
| PW0115 | 58.8 | 0.027  | 4.44  | 1.13  | 21.4 | 0.74 | 710  | 3.02  | 11.7  | 0.09  | 6.78  | 0.05  | 102  | 1.03 | 0.109  | 19.9  | 0.084 | 0.030 | 0.076 |
| PW0116 | 213  | 0.089  | 20.30 | 1.45  | 54.6 | 0.72 | 2780 | 1.72  | 59.4  | 0.19  | 13.9  | 0.17  | 218  | 1.60 | 0.453  | 220   | 0.305 | 0.553 | 0.223 |
| PW0214 |      |        |       |       |      |      | 181  |       |       |       |       |       | 66.4 |      |        |       |       |       |       |
| PW0516 | 165  | 0.019  | 2.30  | 0.23  | 26.0 | 0.56 | 83   | 2.65  | 11.8  | 0.02  | 5.52  | 0.05  | 91.8 | 0.40 | 0.028  | 26.7  | <0.03 | 0.055 | <0.02 |
| PW0616 | 287  | 0.019  | 1.28  | 1.88  | 48.3 | 1.07 | 37   | 6.88  | 9.27  | 0.47  | 4.41  | 0.20  | 66.9 | 2.69 | 0.332  | 45.2  | 0.146 | 0.213 | 0.196 |
| PW0714 |      |        |       |       |      |      | 183  |       |       |       |       |       | 71.1 |      |        |       |       |       |       |
| PW0916 | 303  | 0.019  | 2.06  | 3.42  | 54.2 | 2.01 | 63   | 4.11  | 12.2  | 0.53  | 3.62  | 0.36  | 81.4 | 4.89 | 0.424  | 51.5  | 0.214 | 0.167 | 0.323 |
| PW1016 | 255  | 0.014  | 2.56  | 2.22  | 84.0 | 0.96 | 52   | 1.75  | 24.9  | 0.48  | 3.28  | 0.17  | 35.0 | 2.86 | 0.451  | 73.3  | 0.216 | 0.111 | 0.261 |
| PW1116 | 17.6 | 0.010  | 1.15  | 0.65  | 54.0 | 0.85 | 38   | 1.32  | 16.5  | 0.12  | 4.35  | <0.05 | 21.2 | 0.89 | 0.073  | 18.4  | 0.042 | 0.016 | 0.059 |
| PWD14  |      |        |       |       |      |      | 19   |       |       |       |       |       | 16.3 |      |        |       |       |       |       |
| MP0214 |      |        |       |       |      |      | 31   |       |       |       |       |       | 75.7 |      |        |       |       |       |       |
| MP0215 | 31.2 | 0.015  | 1.06  | 0.35  | 13.3 | 0.85 | 66   | 0.12  | 26.4  | 0.02  | 4.20  | <0.05 | 94.7 | 0.22 | 0.077  | 4.67  | <0.03 | 0.038 | 0.042 |
| MP0216 | 92.7 | 0.015  | 0.98  | 0.44  | 14.0 | 0.74 | 49   | 0.27  | 16.7  | 0.05  | 3.93  | <0.05 | 72.4 | 0.52 | 0.121  | 22.5  | 0.043 | 0.082 | 0.058 |
| MP0314 |      |        |       |       |      |      | 85   |       |       |       |       |       | 89.1 |      |        |       |       |       |       |
| MP0315 | 24.4 | 0.017  | 0.96  | 0.22  | 8.38 | 0.97 | 73   | 0.08  | 33.7  | <0.01 | 5.15  | <0.05 | 113  | 0.12 | 0.047  | 12.0  | <0.03 | 0.025 | <0.02 |
| MP0414 |      |        |       |       |      |      | 4    |       |       |       |       |       | 16.5 |      |        |       |       |       |       |
| MP0514 |      |        |       |       |      |      | 67   |       |       |       |       |       | 49.1 |      |        |       |       |       |       |
| MP0516 | 20.1 | 0.005  | 1.04  | 0.26  | 7.52 | 0.61 | 35   | 1.29  | 5.40  | 0.03  | 4.48  | <0.05 | 43.6 | 0.49 | 0.056  | 3.41  | <0.03 | 0.115 | 0.022 |
| MP0814 |      |        |       |       |      |      | 10   |       |       |       |       |       | 60.2 |      |        |       |       |       |       |
| MP0916 | 148  | 0.008  | 0.526 | 1.48  | 11.5 | 0.90 | 16   | 1.86  | 3.34  | 0.17  | 3.36  | 0.11  | 54.1 | 2.08 | 0.236  | 38.0  | 0.103 | 0.178 | 0.123 |
| MP1016 | 109  | 0.005  | 0.642 | 1.17  | 9.6  | 1.23 | 36   | 1.05  | 4.47  | 0.16  | 3.12  | 0.10  | 47.9 | 1.82 | 0.180  | 37.8  | 0.077 | 0.070 | 0.111 |
| MP1116 | 46.3 | <0.002 | 0.237 | 0.22  | 1.51 | 0.47 | 8    | 0.07  | 1.48  | 0.04  | 0.37  | <0.05 | 8.64 | 0.48 | 0.026  | 8.18  | <0.03 | 0.006 | 0.028 |
| MP1216 | 81.0 | 0.006  | 0.512 | 0.82  | 12.3 | 0.98 | 19   | 0.30  | 3.82  | 0.13  | 2.03  | 0.10  | 62.1 | 1.58 | 0.161  | 18.5  | 0.183 | 0.054 | 0.107 |
| MP1316 | 22.3 | 0.005  | 0.560 | 0.79  | 7.48 | 0.44 | 20   | 0.87  | 5.14  | 0.05  | 3.19  | <0.05 | 24.4 | 0.78 | 0.135  | 7.16  | 0.042 | 0.040 | 0.050 |
| MP1516 | 84.4 | 0.048  | 2.42  | 0.75  | 9.28 | 1.30 | 163  | 0.59  | 9.79  | 0.11  | 2.51  | <0.05 | 49.6 | 1.01 | 0.114  | 11.00 | 0.058 | 0.048 | 0.065 |
| ST0114 |      |        |       |       |      |      | 14   |       |       |       |       |       | 25.7 |      |        |       |       |       |       |
| ST0115 | 11.2 | 0.005  | 0.155 | 0.20  | 4.21 | 0.24 | 9    | 0.36  | 3.73  | 1.55  | 2.75  | <0.05 | 25.6 | 0.15 | 0.043  | 6.83  | <0.03 | 0.021 | 0.027 |
| STD14  |      |        |       |       |      |      | 32   |       |       |       |       |       | 16.3 |      |        |       |       |       |       |
| STIT16 | 88.5 | 0.002  | 0.345 | 0.72  | 3.06 | 0.47 | 10   | <0.05 | 1.27  | 0.10  | 0.60  | 0.08  | 6.43 | 1.32 | 0.130  | 4.32  | <0.03 | 0.017 | 0.056 |
| STAW16 | 26.8 | <0.002 | 0.014 | <0.01 | <0.1 | 0.04 | 0    | <0.05 | <0.05 | <0.01 | <0.03 | <0.05 | 1.36 | 0.29 | <0.005 | 1.24  | <0.03 | 0.002 | <0.02 |
| L2515  | 9.79 | 0.007  | 0.084 | 0.56  | 1.33 | 1.30 | 4    | <0.05 | 1.88  | 0.12  | 6.63  | <0.05 | 48.4 | 0.13 | 0.017  | 4.57  | <0.03 | 0.011 | <0.02 |
| L2516  | 69.0 | <0.002 | 0.079 | 0.11  | 0.86 | 1.61 | 3    | <0.05 | 1.47  | <0.01 | 5.38  | <0.05 | 41.4 | 0.28 | 0.015  | 3.27  | <0.03 | 0.012 | <0.02 |
| L3815  | 3.80 | 0.003  | 0.212 | 0.24  | 1.60 | 0.23 | 17   | <0.05 | 1.11  | 0.05  | 0.70  | <0.05 | 7.22 | 0.37 | 0.027  | 2.01  | <0.03 | 0.006 | <0.02 |

(continued)

Table S10. Continued.

| Sample          | La    | Ce    | Pr     | Nd    | Sm     | Eu     | Gd     | Tb     | Dy     | Ho     | Er     | Tm     | Yb     | Lu     |
|-----------------|-------|-------|--------|-------|--------|--------|--------|--------|--------|--------|--------|--------|--------|--------|
| $\mu\text{g/L}$ |       |       |        |       |        |        |        |        |        |        |        |        |        |        |
| PW0114          |       |       |        |       |        |        |        |        |        |        |        |        |        |        |
| PW0115          | 0.803 | 1.450 | 0.156  | 0.538 | 0.067  | 0.010  | 0.038  | <0.005 | 0.022  | <0.005 | 0.010  | <0.004 | 0.008  | <0.005 |
| PW0116          | 3.810 | 6.830 | 0.668  | 2.500 | 0.309  | 0.055  | 0.164  | 0.017  | 0.081  | 0.015  | 0.038  | 0.005  | 0.030  | 0.005  |
| PW0214          |       |       |        |       |        |        |        |        |        |        |        |        |        |        |
| PW0516          | 0.205 | 0.310 | 0.033  | 0.128 | 0.016  | 0.008  | 0.010  | <0.005 | <0.005 | <0.005 | <0.005 | <0.004 | <0.005 | <0.005 |
| PW0616          | 2.410 | 4.540 | 0.475  | 1.640 | 0.240  | 0.046  | 0.130  | 0.014  | 0.073  | 0.012  | 0.029  | <0.004 | 0.023  | <0.005 |
| PW0714          |       |       |        |       |        |        |        |        |        |        |        |        |        |        |
| PW0916          | 2.890 | 5.510 | 0.559  | 1.910 | 0.305  | 0.060  | 0.167  | 0.019  | 0.094  | 0.017  | 0.041  | 0.005  | 0.032  | <0.005 |
| PW1016          | 3.150 | 6.340 | 0.625  | 2.230 | 0.316  | 0.060  | 0.181  | 0.020  | 0.105  | 0.017  | 0.043  | 0.005  | 0.032  | 0.005  |
| PW1116          | 0.476 | 0.909 | 0.095  | 0.324 | 0.041  | 0.008  | 0.029  | <0.005 | 0.015  | <0.005 | 0.007  | <0.004 | 0.006  | <0.005 |
| PWD14           |       |       |        |       |        |        |        |        |        |        |        |        |        |        |
| MP0214          |       |       |        |       |        |        |        |        |        |        |        |        |        |        |
| MP0215          | 0.542 | 0.905 | 0.107  | 0.386 | 0.050  | 0.008  | 0.028  | <0.005 | 0.015  | <0.005 | 0.007  | <0.004 | 0.006  | <0.005 |
| MP0216          | 0.827 | 1.420 | 0.164  | 0.573 | 0.071  | 0.015  | 0.042  | <0.005 | 0.022  | <0.005 | 0.010  | <0.004 | 0.007  | <0.005 |
| MP0314          |       |       |        |       |        |        |        |        |        |        |        |        |        |        |
| MP0315          | 0.350 | 0.490 | 0.058  | 0.206 | 0.026  | <0.005 | 0.015  | <0.005 | 0.008  | <0.005 | <0.005 | <0.004 | <0.005 | <0.005 |
| MP0414          |       |       |        |       |        |        |        |        |        |        |        |        |        |        |
| MP0514          |       |       |        |       |        |        |        |        |        |        |        |        |        |        |
| MP0516          | 0.346 | 0.550 | 0.067  | 0.229 | 0.031  | 0.007  | 0.019  | <0.005 | 0.009  | <0.005 | <0.005 | <0.004 | <0.005 | <0.005 |
| MP0814          |       |       |        |       |        |        |        |        |        |        |        |        |        |        |
| MP0916          | 1.370 | 2.410 | 0.261  | 0.875 | 0.139  | 0.033  | 0.074  | 0.008  | 0.043  | 0.007  | 0.019  | <0.004 | 0.013  | <0.005 |
| MP1016          | 1.090 | 2.000 | 0.210  | 0.733 | 0.114  | 0.025  | 0.067  | 0.007  | 0.037  | 0.007  | 0.016  | <0.004 | 0.010  | <0.005 |
| MP1116          | 0.211 | 0.423 | 0.044  | 0.141 | 0.018  | 0.005  | 0.010  | <0.005 | 0.005  | <0.005 | <0.005 | <0.004 | <0.005 | <0.005 |
| MP1216          | 1.160 | 1.980 | 0.225  | 0.774 | 0.096  | 0.021  | 0.061  | 0.006  | 0.033  | 0.005  | 0.013  | <0.004 | 0.010  | <0.005 |
| MP1316          | 0.825 | 1.340 | 0.161  | 0.588 | 0.075  | 0.015  | 0.049  | <0.005 | 0.023  | <0.005 | 0.011  | <0.004 | 0.009  | <0.005 |
| MP1516          | 0.622 | 1.180 | 0.124  | 0.442 | 0.058  | 0.015  | 0.040  | <0.005 | 0.023  | <0.005 | 0.011  | <0.004 | 0.008  | <0.005 |
| ST0114          |       |       |        |       |        |        |        |        |        |        |        |        |        |        |
| ST0115          | 0.357 | 0.516 | 0.069  | 0.245 | 0.031  | <0.005 | 0.019  | <0.005 | 0.009  | <0.005 | <0.005 | <0.004 | <0.005 | <0.005 |
| STD14           |       |       |        |       |        |        |        |        |        |        |        |        |        |        |
| STIT16          | 1.060 | 2.030 | 0.198  | 0.673 | 0.088  | 0.022  | 0.048  | 0.005  | 0.025  | <0.005 | 0.010  | <0.004 | 0.007  | <0.005 |
| STAW16          | 0.007 | 0.015 | <0.005 | 0.006 | <0.005 | <0.005 | <0.005 | <0.005 | <0.005 | <0.005 | <0.005 | <0.004 | <0.005 | <0.005 |
| L2515           | 0.069 | 0.122 | 0.016  | 0.055 | 0.008  | <0.005 | 0.006  | <0.005 | <0.005 | <0.005 | <0.005 | <0.004 | <0.005 | <0.005 |
| L2516           | 0.034 | 0.054 | 0.008  | 0.028 | 0.014  | <0.005 | <0.005 | <0.005 | <0.005 | <0.005 | <0.005 | <0.004 | <0.005 | <0.005 |
| L3815           | 0.213 | 0.410 | 0.044  | 0.147 | 0.018  | <0.005 | 0.010  | <0.005 | 0.006  | <0.005 | <0.005 | <0.004 | <0.005 | <0.005 |

## Stability diagrams

Figure S1 shows the location of the studied moraine porewaters and ponds in diagrams that consider the stability fields of some key aluminosilicate minerals.

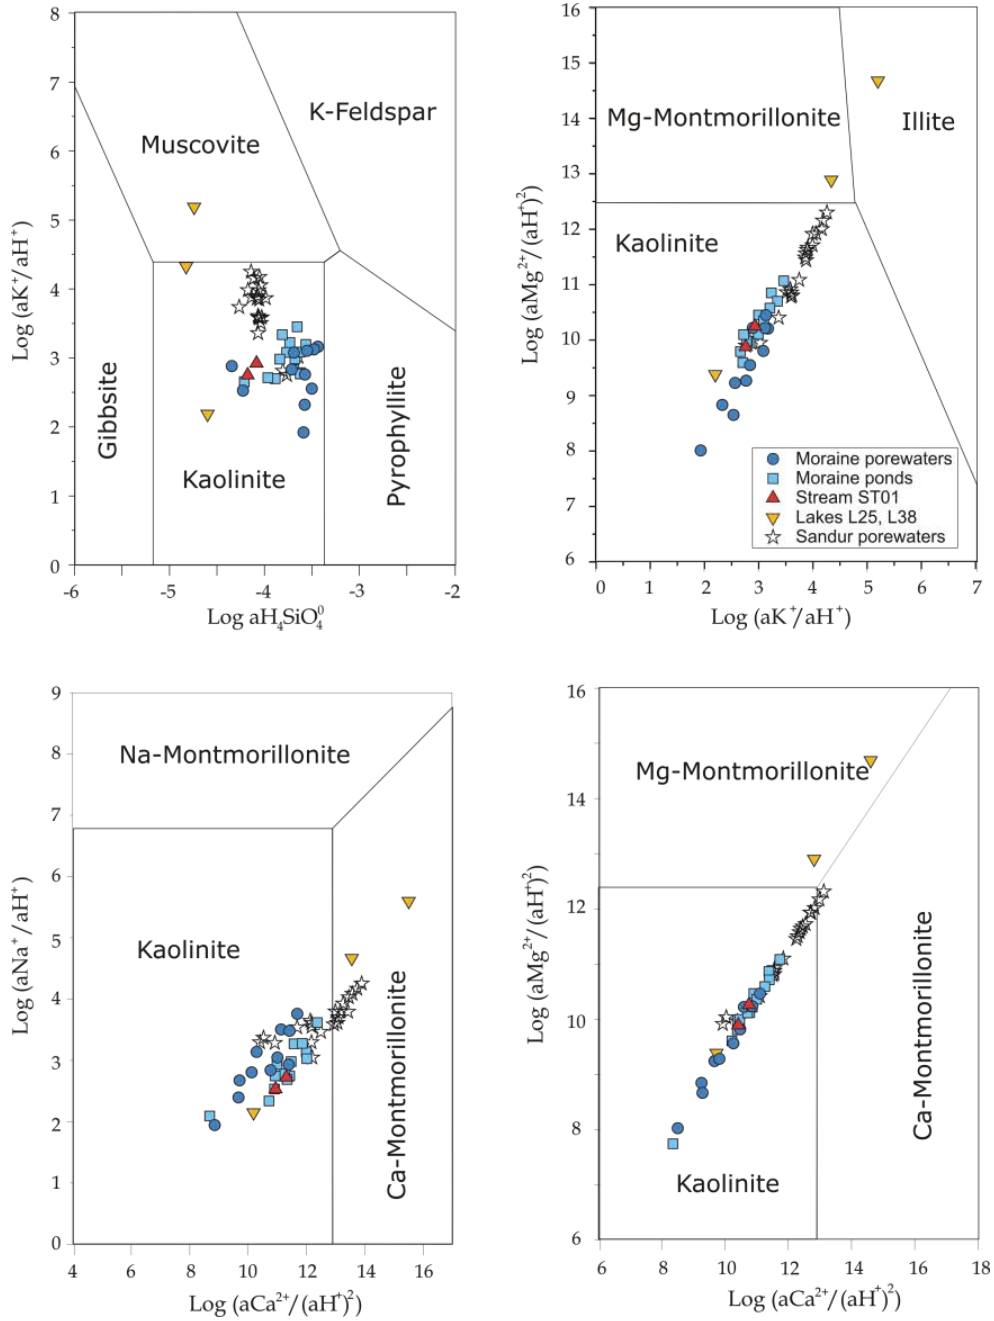

*Figure S1: Mineral stability diagrams calculated for 7 °C showing the composition the studied waters. Sandur porewaters from (Deuerling et al. 2018) are also plotted for comparison. The field boundaries are calculated using the data in (Helgeson 1969; Robie, Hemingway, and Fisher 1979; Hemingway, Haas, Jr., and Robinson, Jr. 1982). Upper right and bottom diagrams have been constructed considering a value of  $-3.7$  for the logarithm of silica activity.*



## Additional diagrams

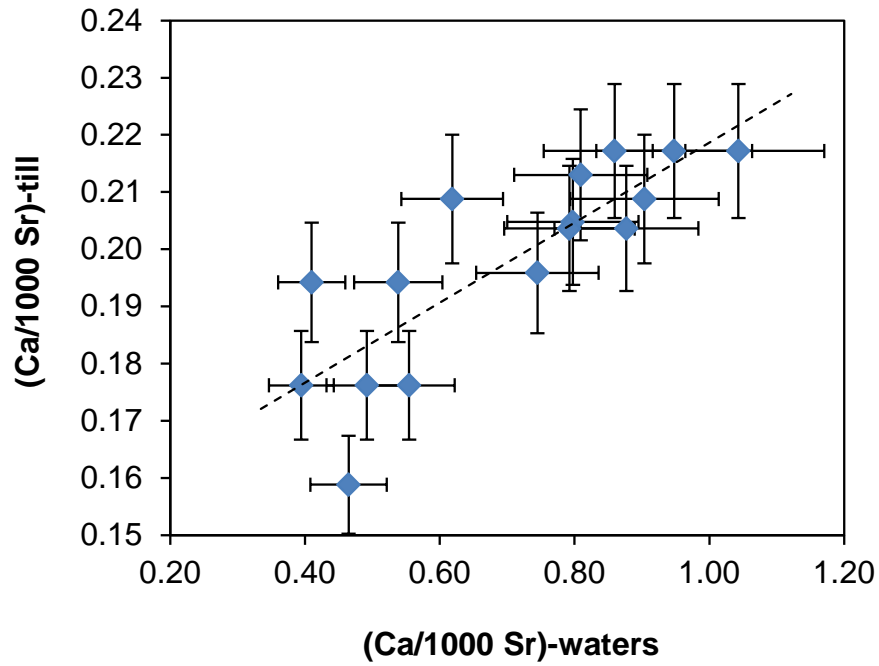

Figure S2: Molar ratios ( $\text{Ca}/(1000 \text{ Sr})$ ) for the two finest till fractions (data from Tables S3 and S4), plotted against the corresponding values for the waters sampled at the same location (data from Table S9). The regression line has  $R = 0.82$ , and the error bars correspond to the maximum uncertainty of the analyses.

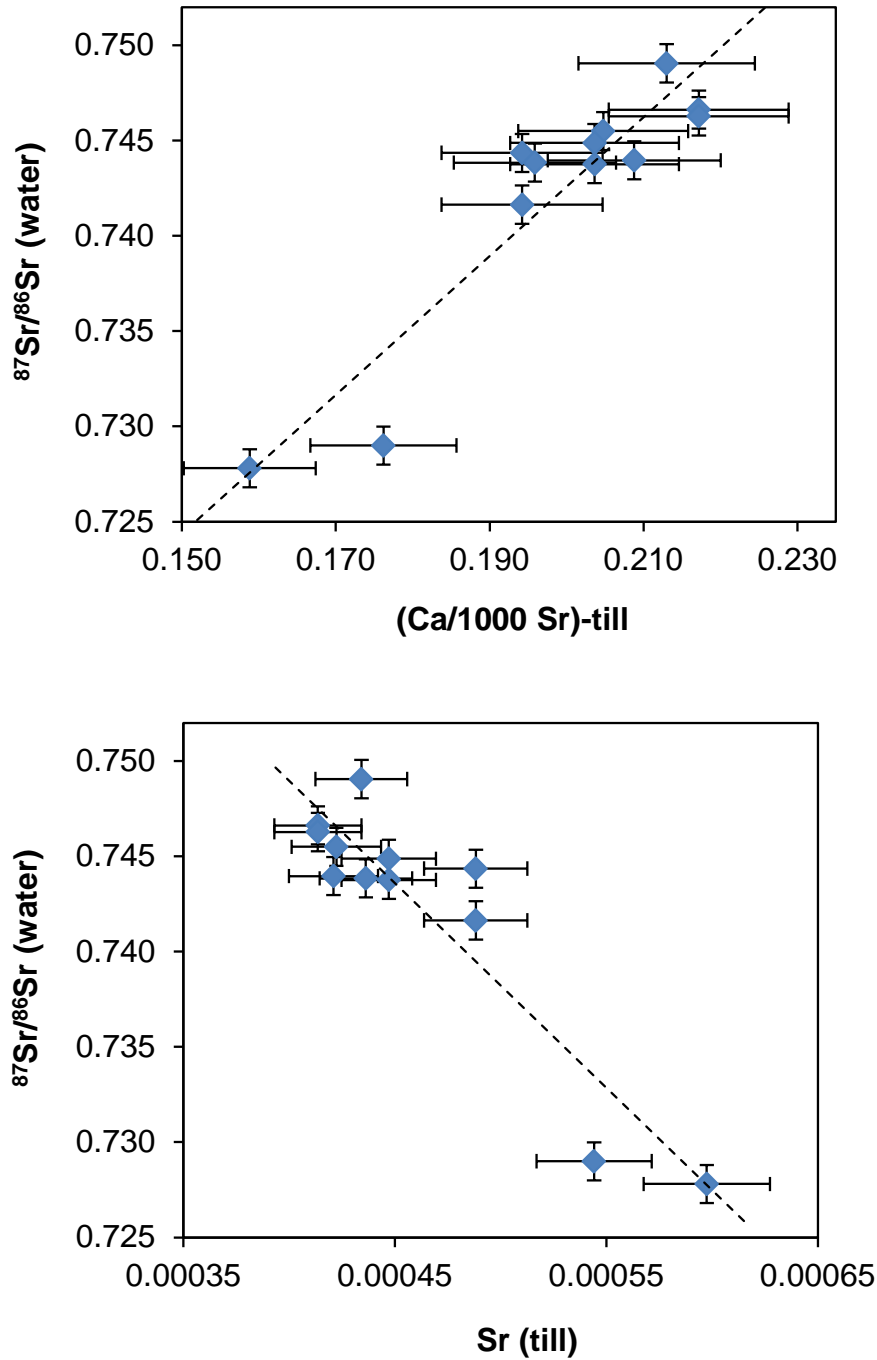

Figure S3: Top:  $^{87}\text{Sr}/^{86}\text{Sr}$  ratios for the waters (data from Table S9) plotted against the molar ratios  $(\text{Ca}/1000 \text{ Sr})$  for the two finest till fractions sampled at the same location (data from Tables S3 and S4); the regression line has  $R = 0.93$ . Bottom:  $^{87}\text{Sr}/^{86}\text{Sr}$  ratios for the waters (data from Table S9) plotted against the strontium contents of the two finest till fractions (mol/100 g, data from Table S4) sampled at the same location; the regression line has  $R = 0.92$ . For both diagrams the error bars represent the maximum uncertainties reported for the analytical procedures.

## References

- Deuerling, K. M., J. B. Martin, E. E. Martin, and C. A. Scribner. 2018. "Hydrologic Exchange and Chemical Weathering in a Proglacial Watershed near Kangerlussuaq, West Greenland." *Journal of Hydrology* 556: 220–32. <https://doi.org/10.1016/j.jhydrol.2017.11.002>.
- Harper, J., A. Hubbard, T. Ruskeeniemi, L. Claesson Liljedahl, A. Kontula, M. Hobbs, J. Brown, et al. 2016. "The Greenland Analogue Project: Data and Processes." SKB R-14-13. Stockholm, Sweden: Swedish Nuclear Fuel and Waste Management Co. [www.skb.com/publications/](http://www.skb.com/publications/).
- Helgeson, H. C. 1969. "Thermodynamics of Hydrothermal Systems at Elevated Temperatures and Pressures." *American Journal of Science* 267: 729–804.
- Hemingway, B. S., J. R. Haas, Jr., and G. R. Robinson, Jr. 1982. "Thermodynamic Properties of Selected Minerals in the System  $\text{Al}_2\text{O}_3$ - $\text{CaO}$ - $\text{SiO}_2$ - $\text{H}_2\text{O}$  At 298.15 K and 1 Bar ( $10^5$  Pascals) Pressure and at Higher Temperatures." U.S. Geological Survey Bulletin 1544. Washington, D.C.: U.S. Government Printing Office.
- Henkemans, E., S. K. Frape, T. Ruskeeniemi, N. J. Anderson, and M. Hobbs. 2018. "A Landscape Isotopic Approach to the Geochemical Characterization of Lakes in the Kangerlussuaq Region, West Greenland." *Artic, Antartic, and Alpine Research* 50 (1): S100018. <https://doi.org/10.1080/15230430.2017.1420863>.
- Parkhurst, D. L., and C. A. J. Appelo. 2013. "Description of Input and Examples for PHREEQC Version 3 - A Computer Program for Speciation, Batch-Reaction, One-Dimensional Transport, and Inverse Geochemical Calculations." In *U.S. Geological Survey Techniques and Methods, Book 6, Chap. A43*, 497. Denver, Colorado: U.S. Geological Survey; available only at <http://pubs.usgs.gov/tm/06/a43>.
- Robie, R. A., B. S. Hemingway, and J. R. Fisher. 1979. "Thermodynamic Properties of Minerals and Related Substances at 298.15 K and 1 Bar ( $10^5$  Pascals) Pressure and at Higher Temperatures." U.S. Geological Survey Bulletin 1452. U.S. Government Printing Office.

## Photographs of some sampling points

View of the “delta” facing East. The subglacial discharge sampling point (the “ice tunnel”) is at the bottom of the dark glacier tongue in the left side of the photograph. The “ice tunnel” is the source of meltwater passing through the delta. The northern part of the study moraine may be seen behind the dark glacier tongue with the ice sheet in the back. Immediately to the right of the glacier tongue there is a border of bare bedrock, followed by a hill partly covered by till, vegetation and erratics. On the top of the hill, to the right of the photograph (almost too small to be seen) there is a container enclosing the top of the GAP-04 deep borehole and its instrumentation. Photograph taken on 2014-08-30 at 16:56 local time. © I Puigdomenech.

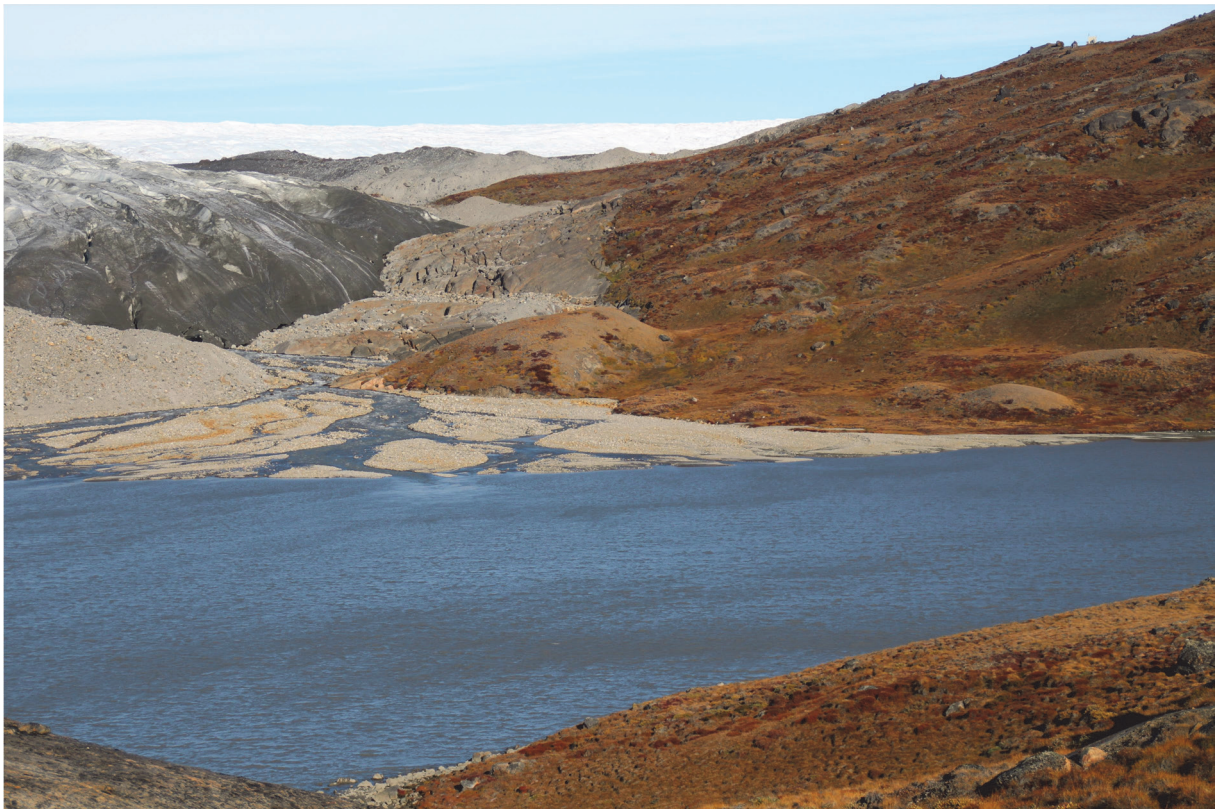



View of MP09 (moraine pond 09) facing the North-East, in the mid part of the moraine, with the ice sheet on the background. The PW09 (porewater tube 09) may be seen at the left of the picture. Dried-up and withered small bushes and grass (reddish-brown) may be seen on the shores. Photograph taken 2016-08-27 at 13:20 local time. © I Puigdomenech.

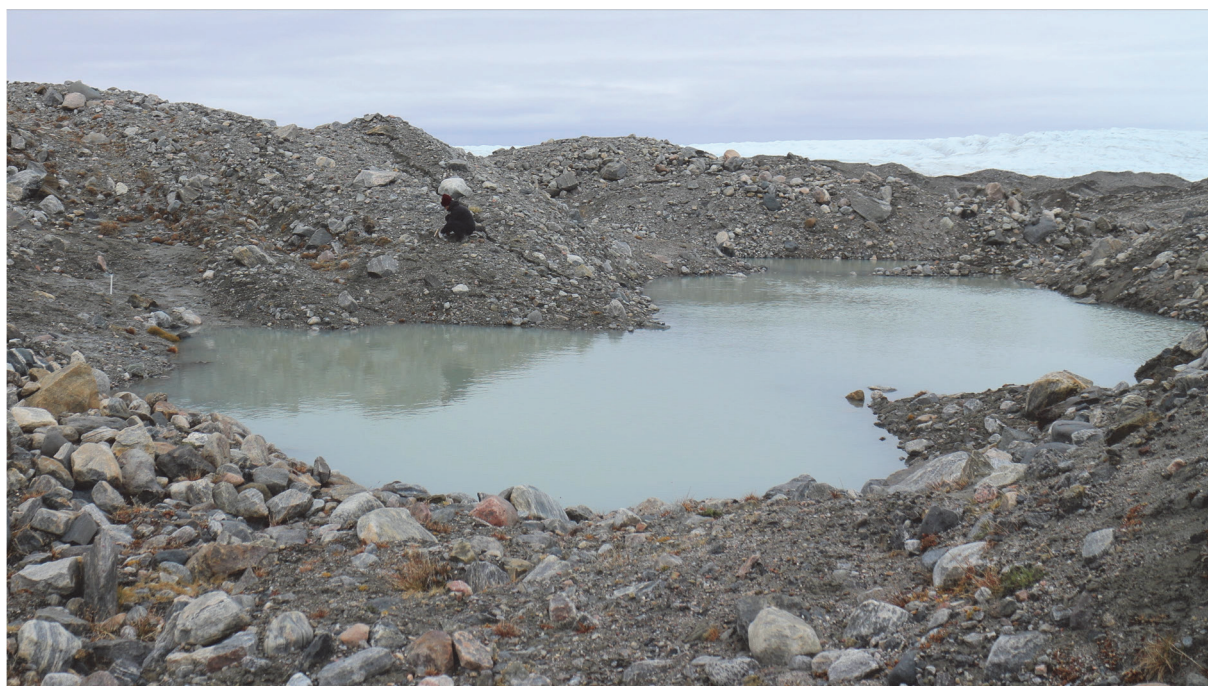

View of MP15 (moraine pond 15) facing South, in the southern part of the studied moraine. The moraine was in this location fully water saturated; the darker patches are newly exposed volumes, probably due to glacier movements. Photograph taken on 2016-08-29 at 16:13 local time. © E-L Tullborg.

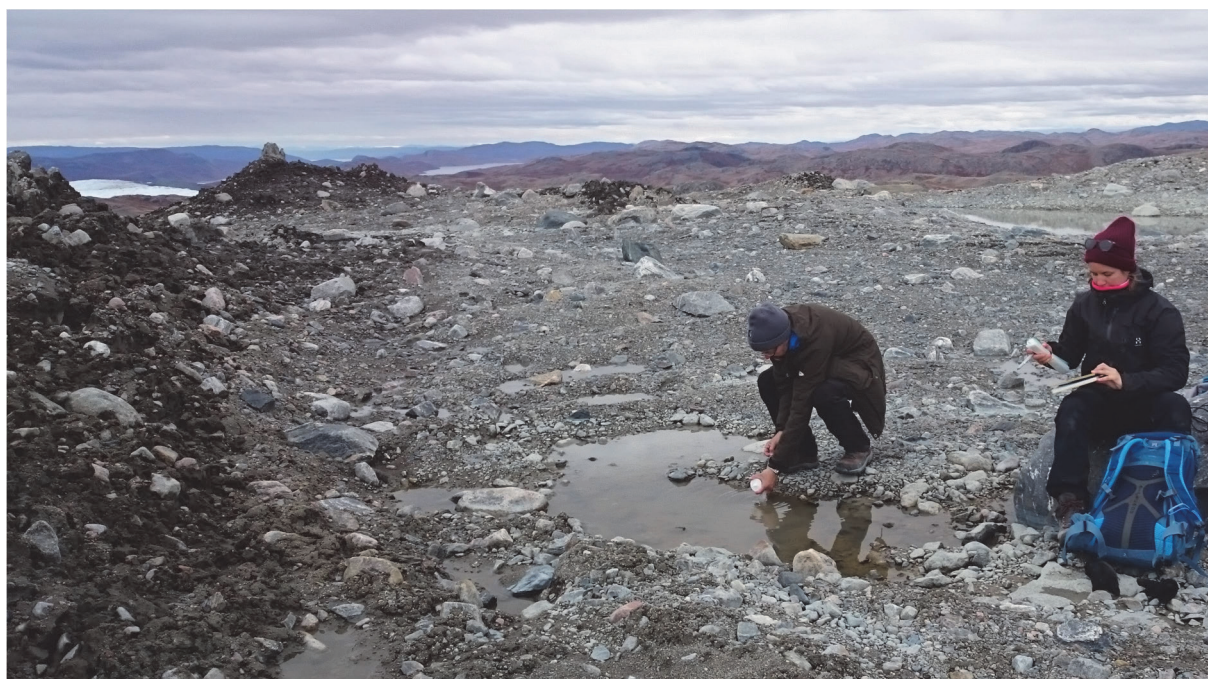



View of the L25 (“drilling water pond”) facing the North-West, with the ice sheet (Isunnguata Sermia) on the background with a terminal moraine (not investigated in this study). The surface of the lake is covered by a few cm thick layer of ice. Photograph taken 2015-09-25 at 14:40 local time. © I Puigdomenech.

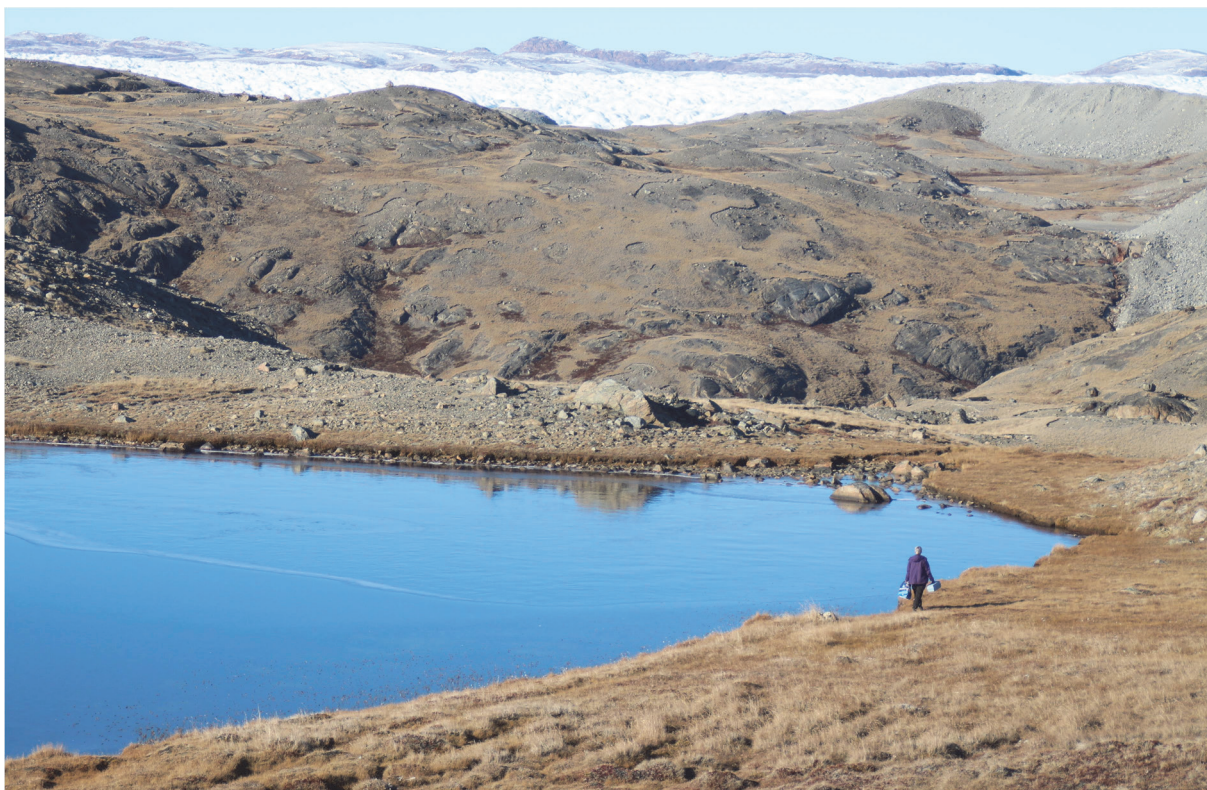

Macrophytes growing in L25 (“drilling water pond”). The surface of the lake is covered by a few cm thick layer of ice; the top of some of the aquatic plants protruding slightly through the ice layer. Photograph taken 2015-09-25 at 14:47 local time. © I Puigdomenech.

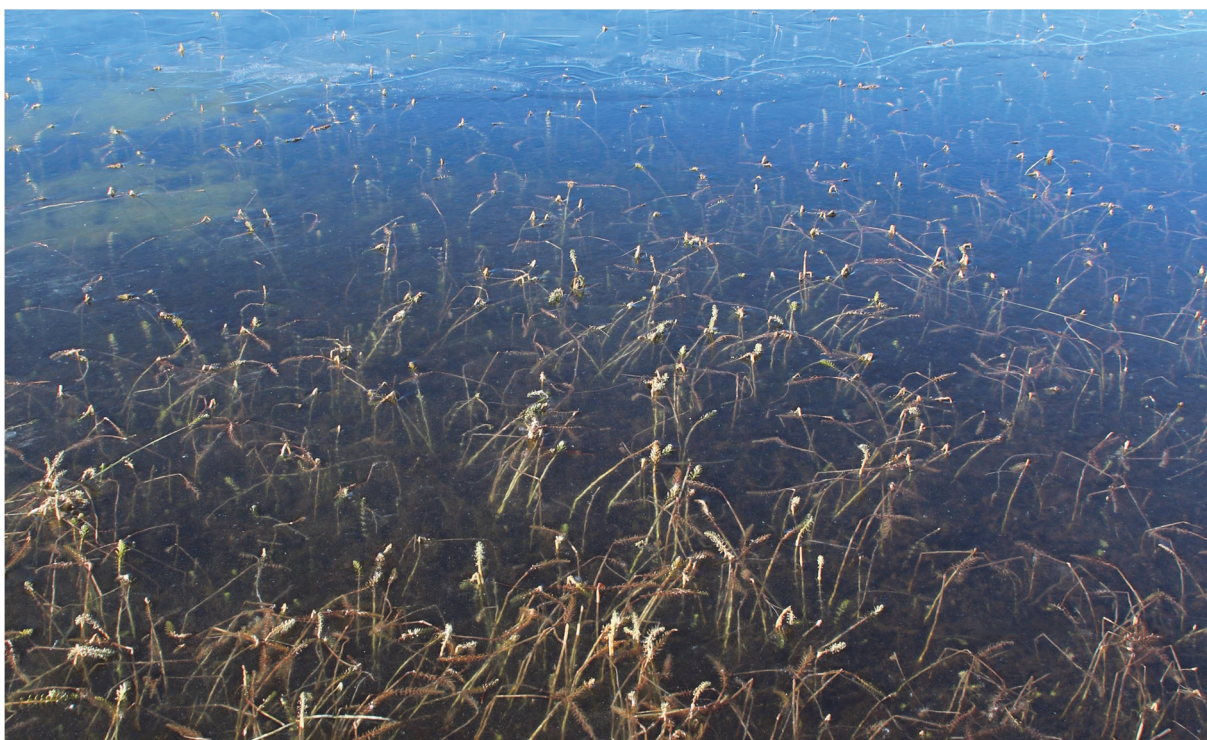



View of the north shore of L38 (“ice dammed lake”) facing East, with Russell glacier in the background. Photograph taken on 2015-09-23 at 14:57 local time. © E-L Tullborg.

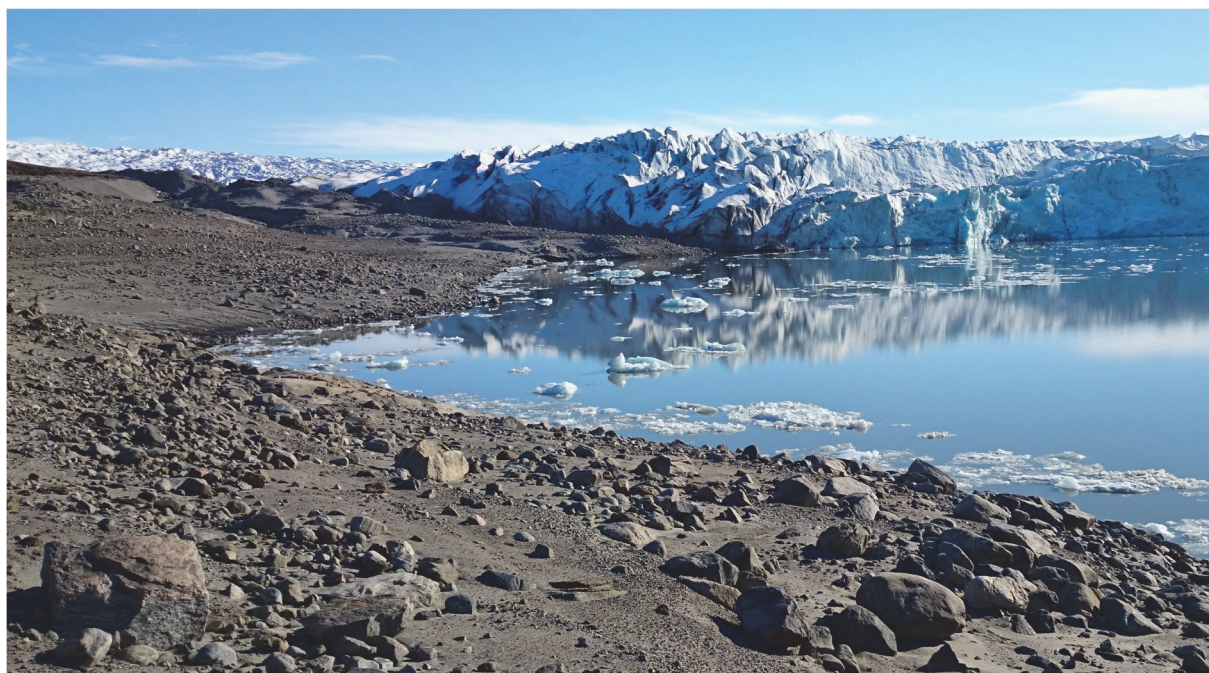

Supplement: Supplementary file 1 [file 1]
